# Supplementary material for: Tea Bags for Fmoc Solid-Phase Peptide Synthesis: An Example of Circular Economy
Source: MDPI journal article supplement (doi:10.3390/molecules26165035), 2021-08-19
Supplement: s1 [file s1]

# Tea-Bags for Fmoc Solid-Phase Peptide Synthesis. an Example of Circular Economy

Fanny Guzmán\*, Adriana Gauna, Tanya Roman, Omar Luna, Claudio Álvarez, Claudia Pareja-Barrueto, Luis Mercado, Fernando Albericio, Constanza Cárdenas\*

Table S1. HPLC chromatograms and Mass spectra for the 52 peptides synthesized.

| Label  | RP-HPLC                                                                             | ESI-MS                                                                               |
|--------|-------------------------------------------------------------------------------------|--------------------------------------------------------------------------------------|
| AQ3283 | 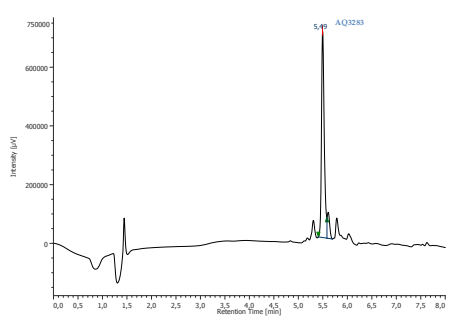   |    |
| AQ3284 |  |  |
| AQ3285 |  |  |

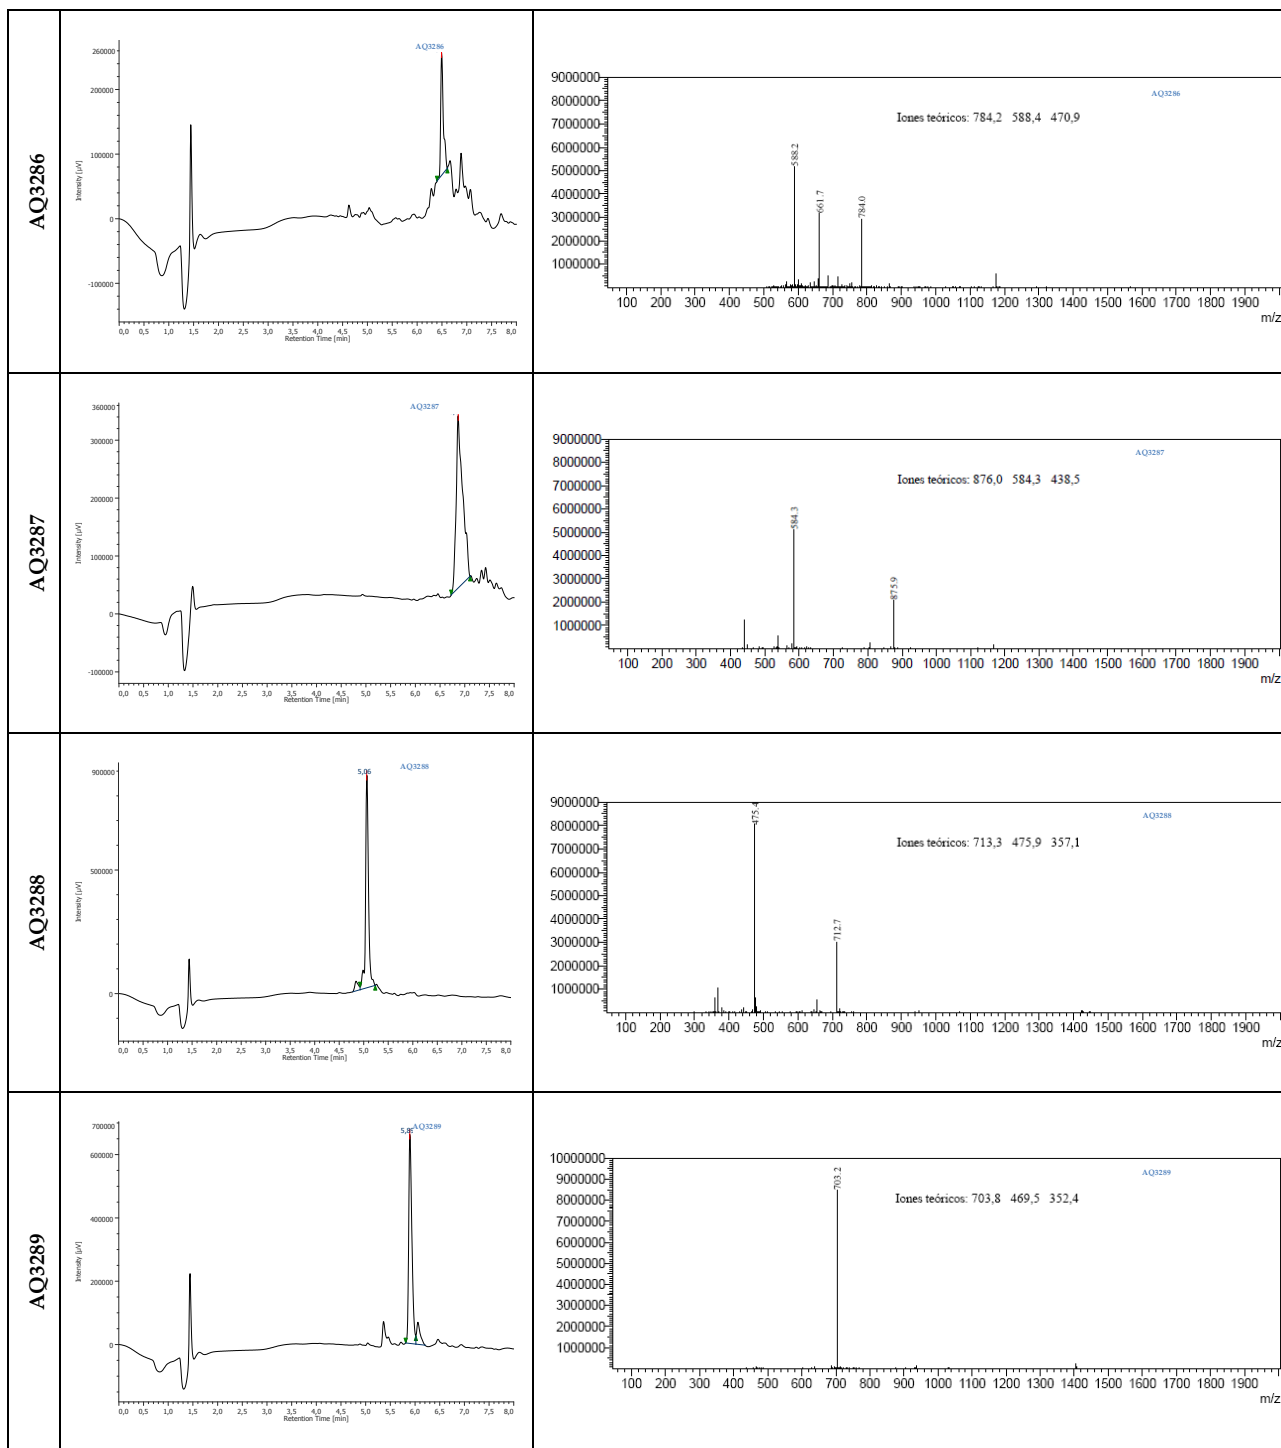

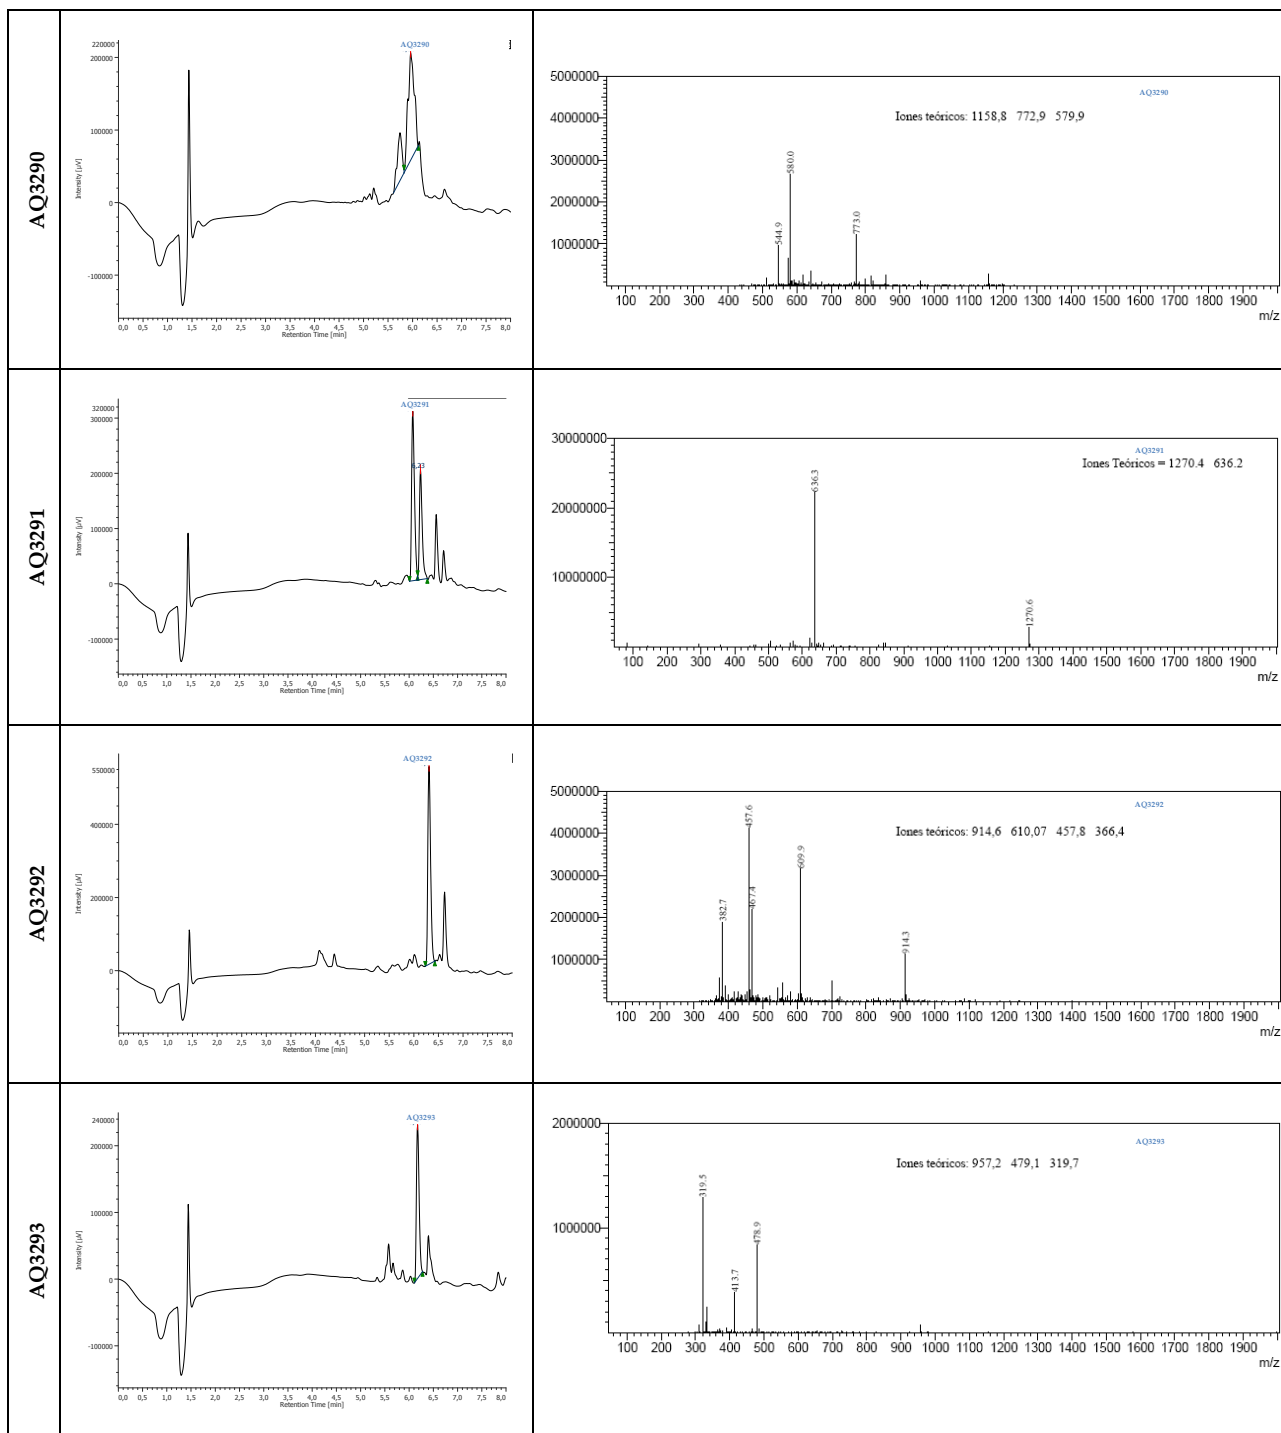

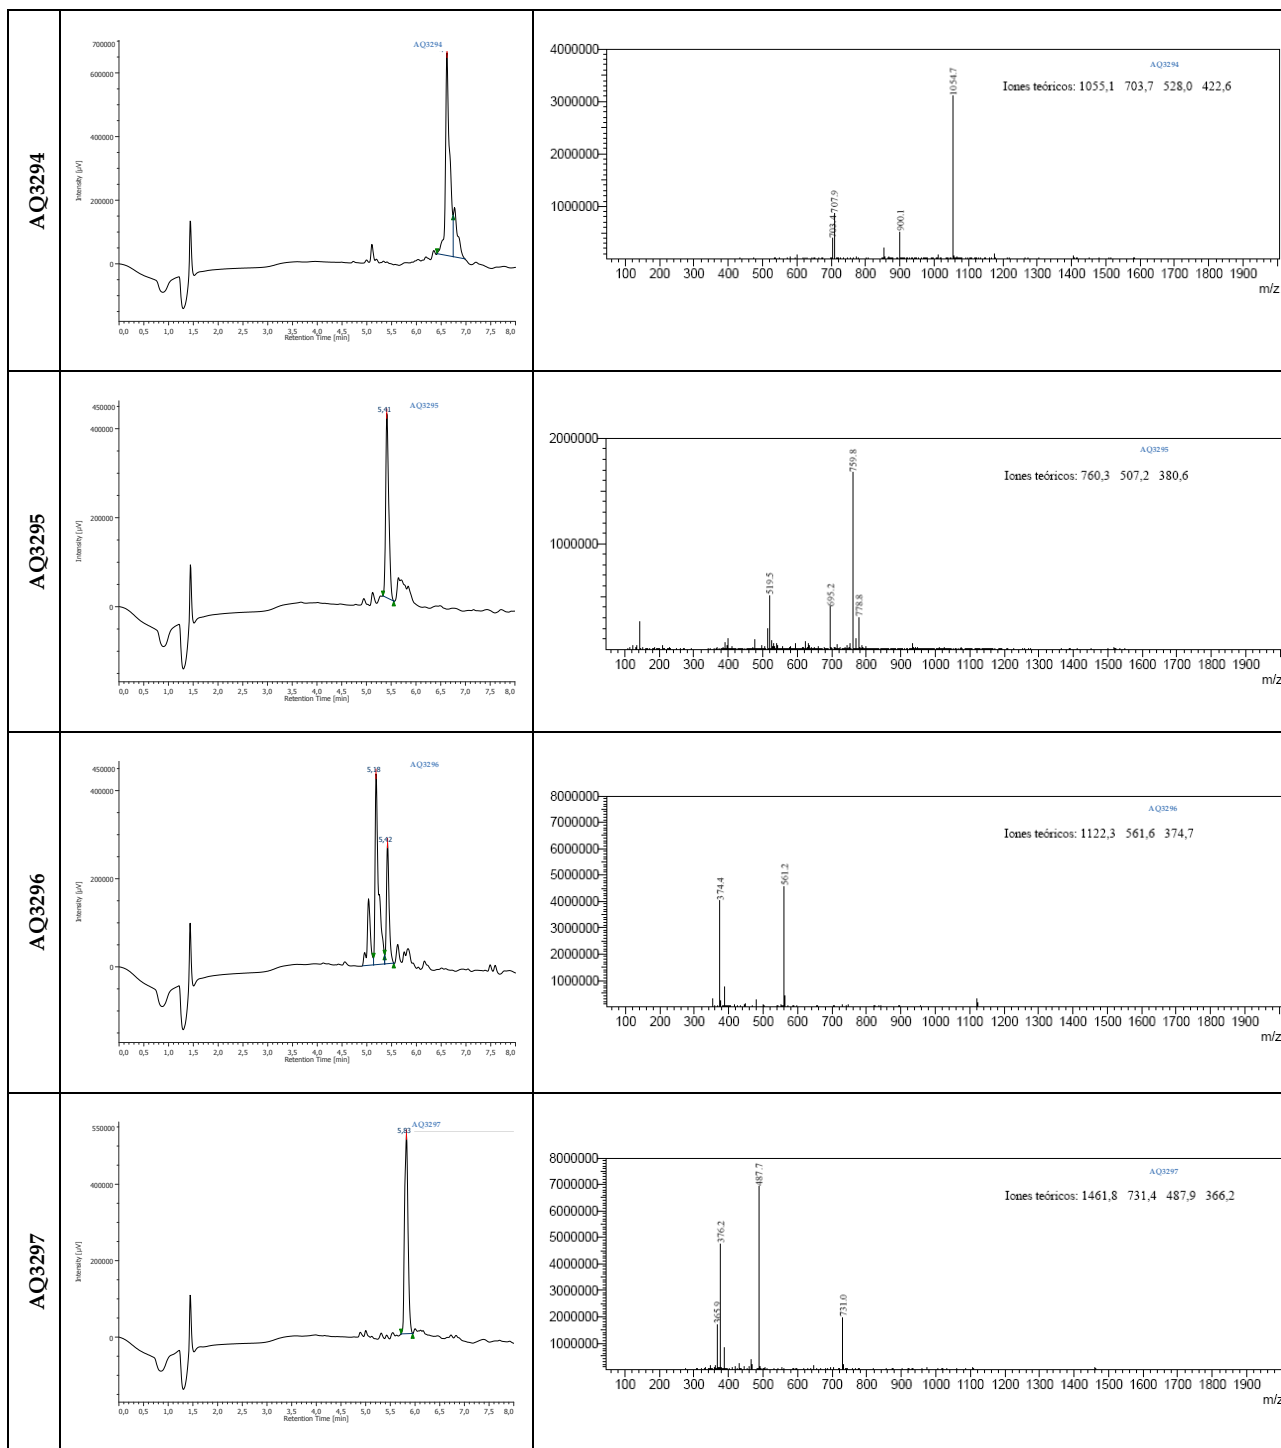

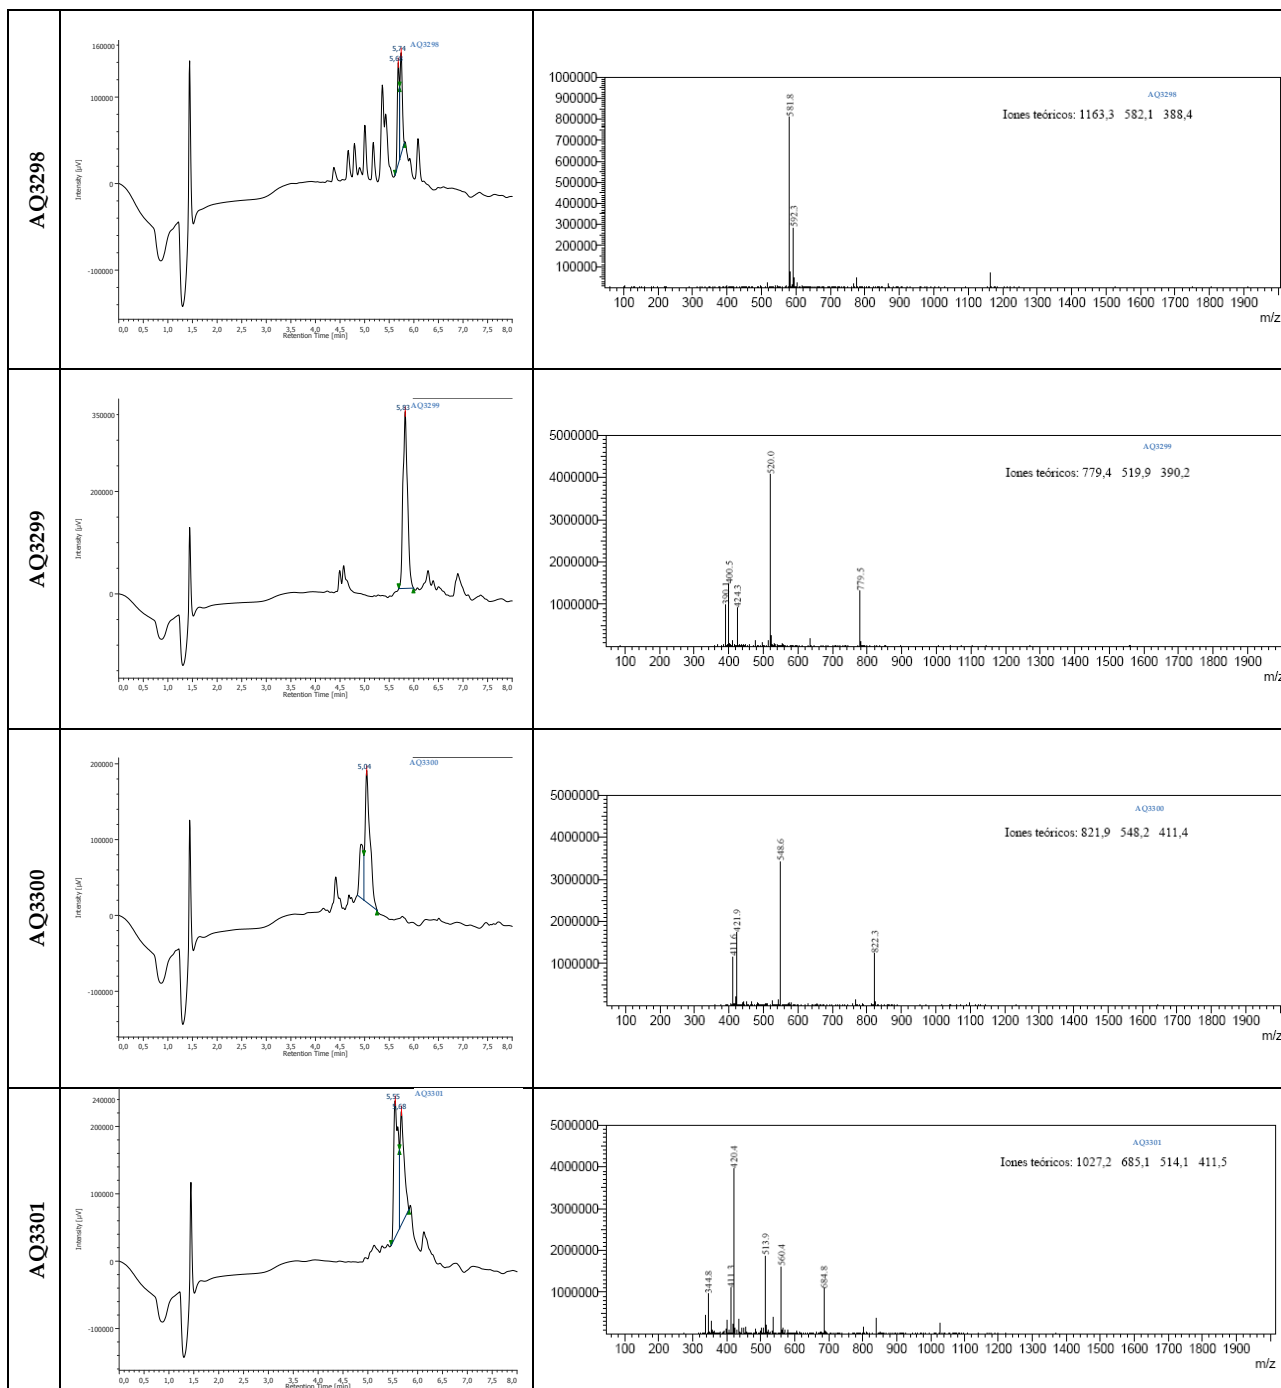

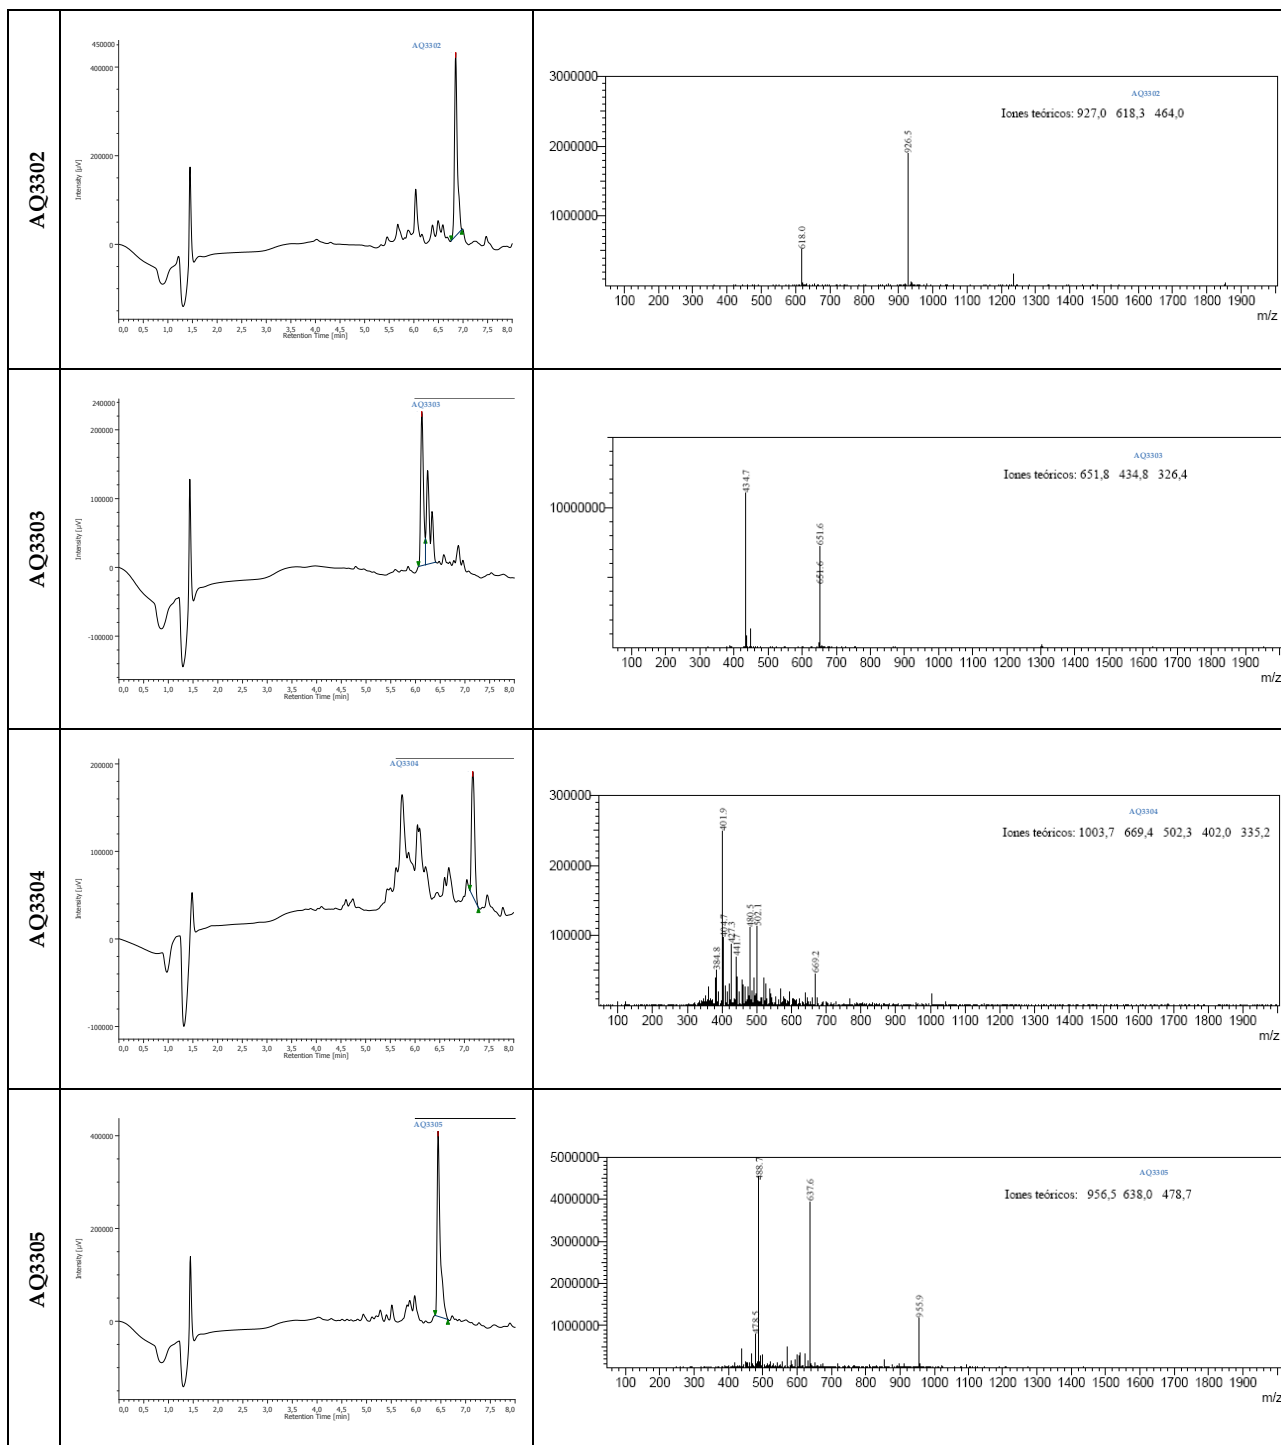

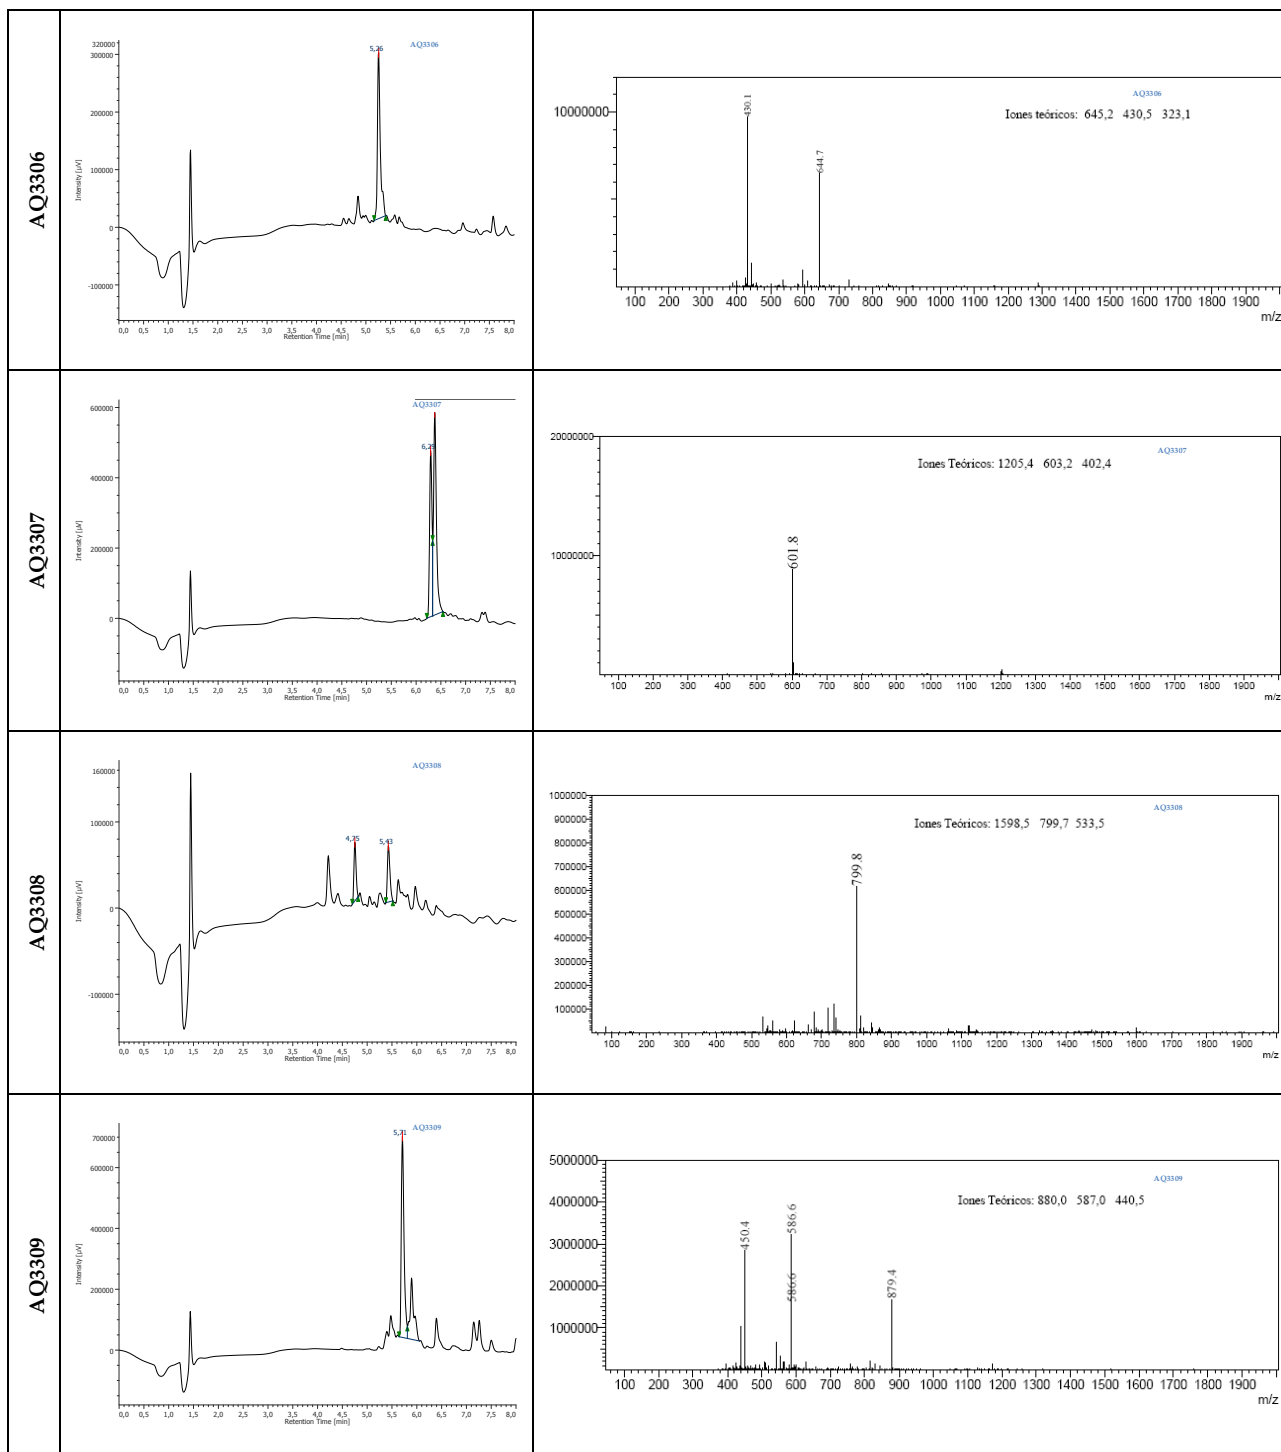

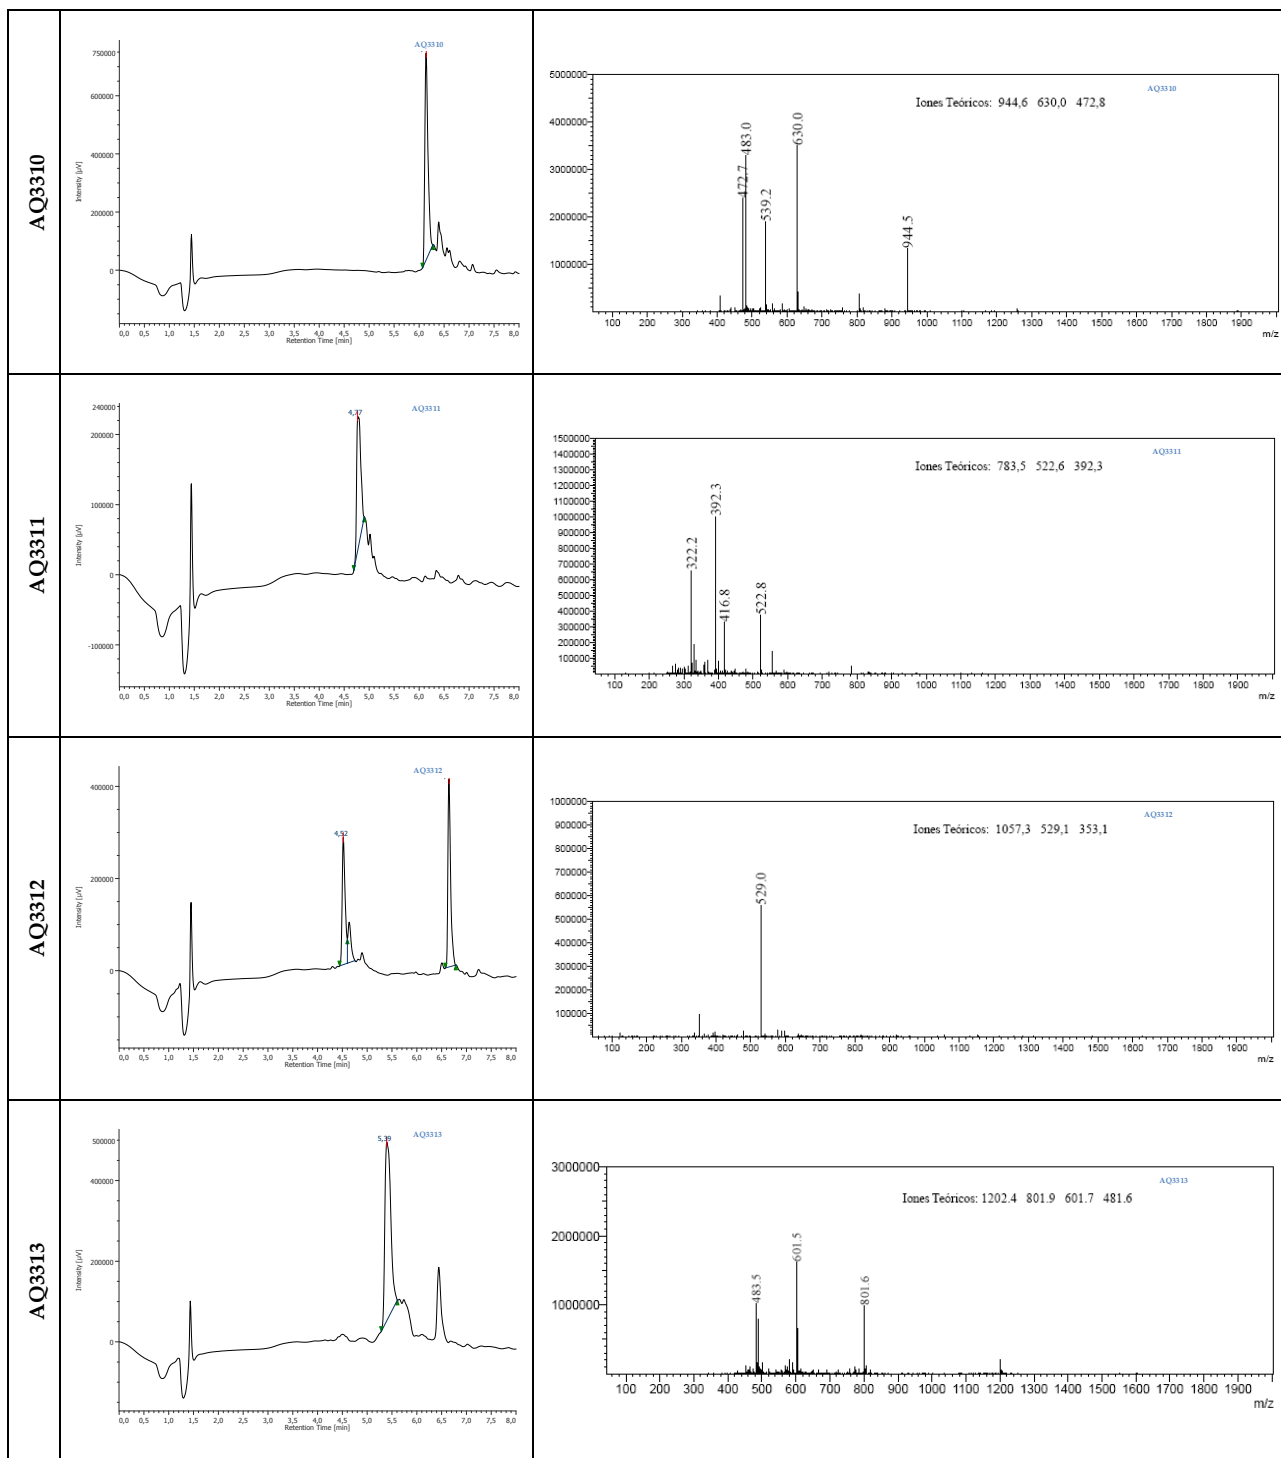



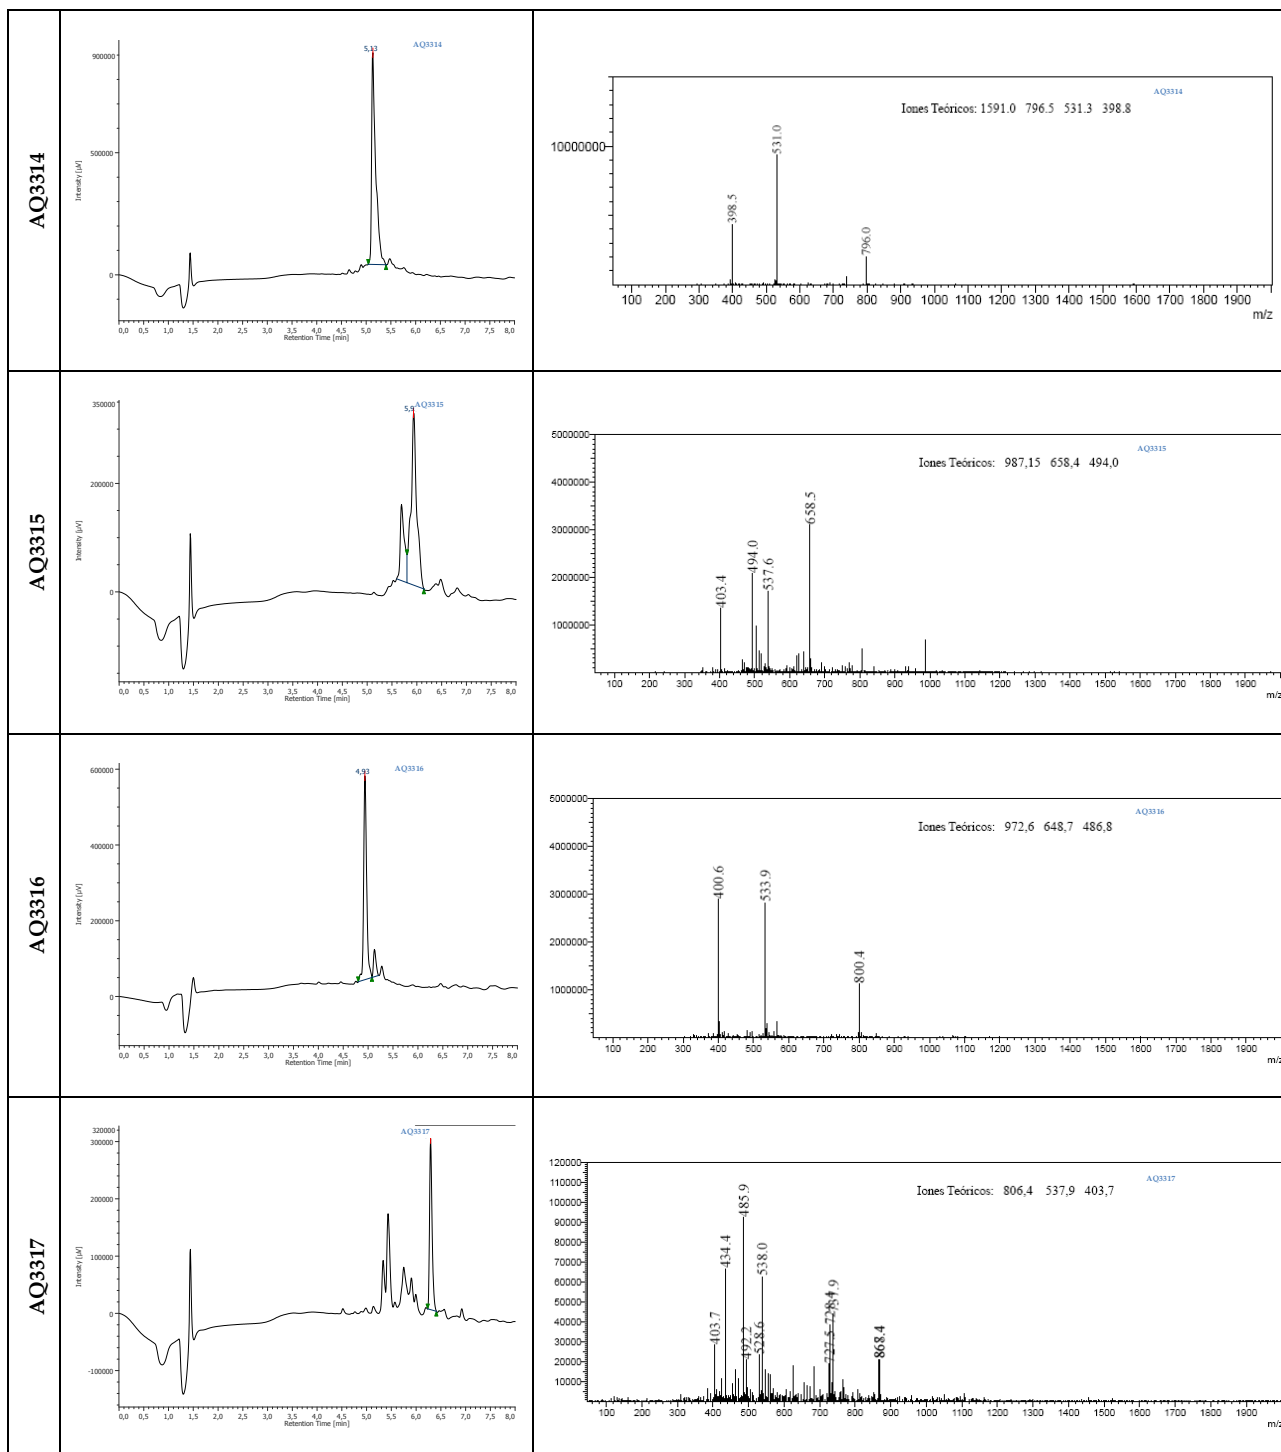

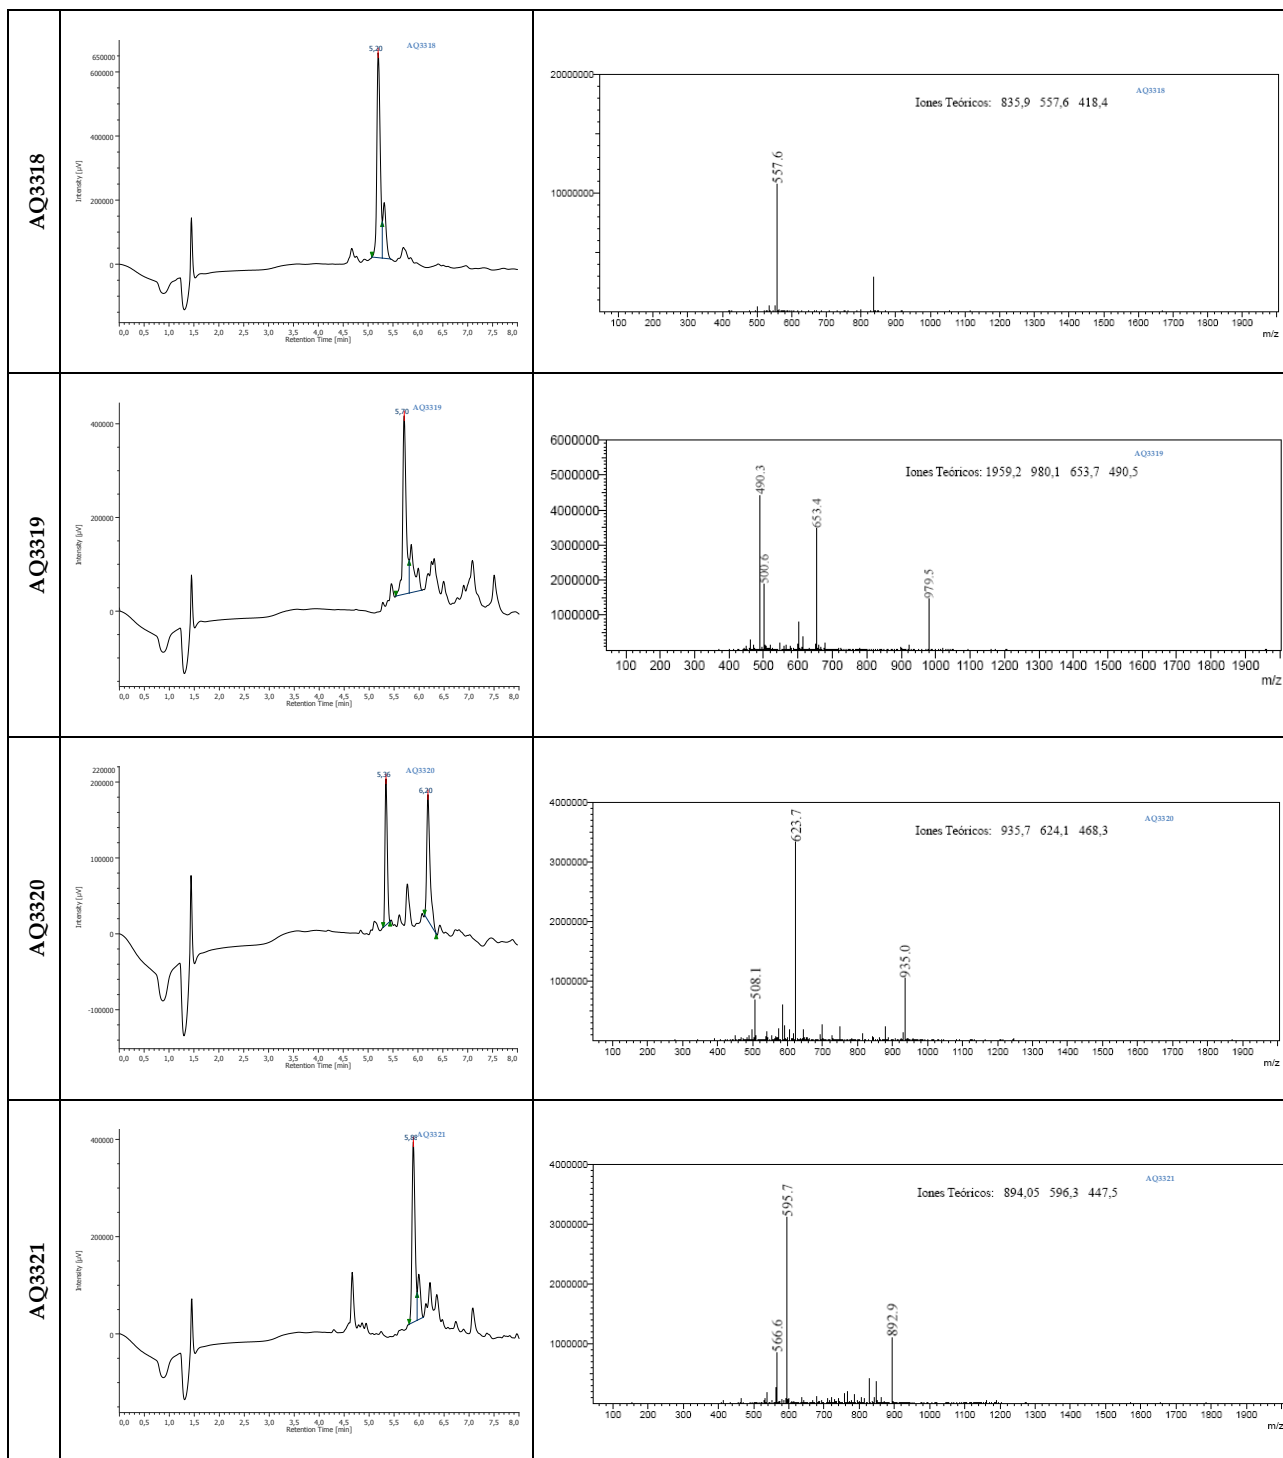

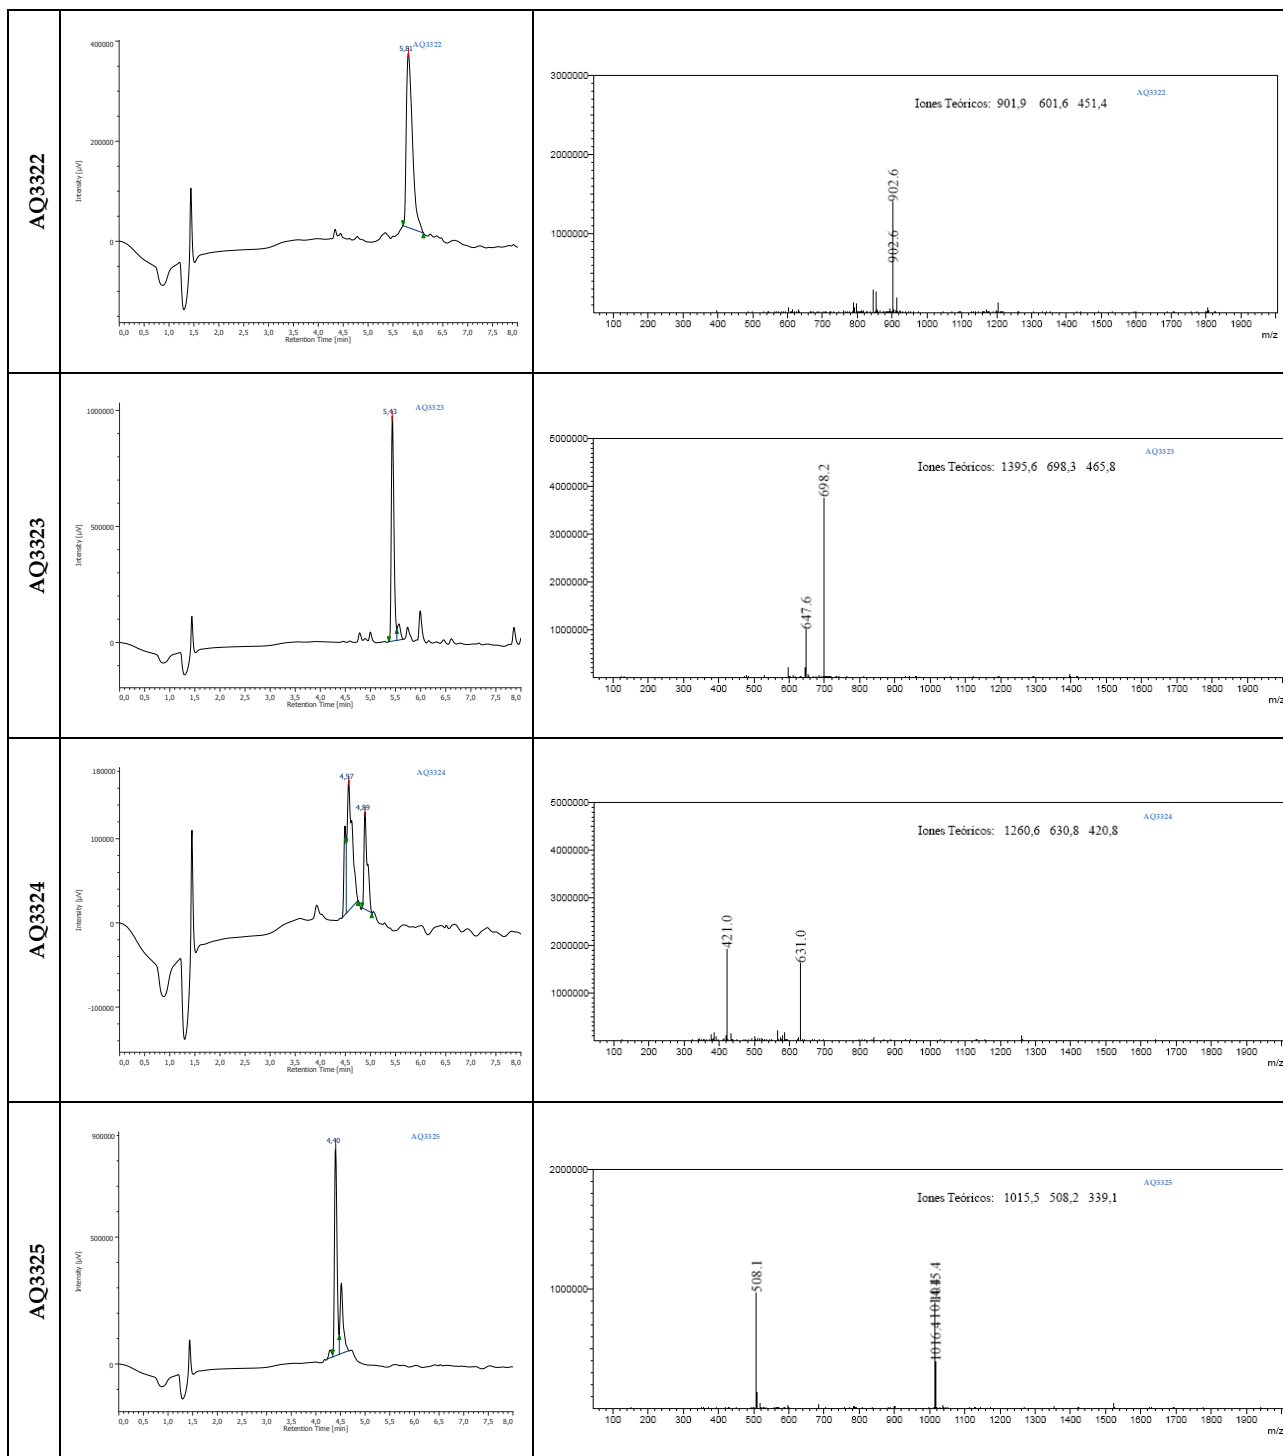

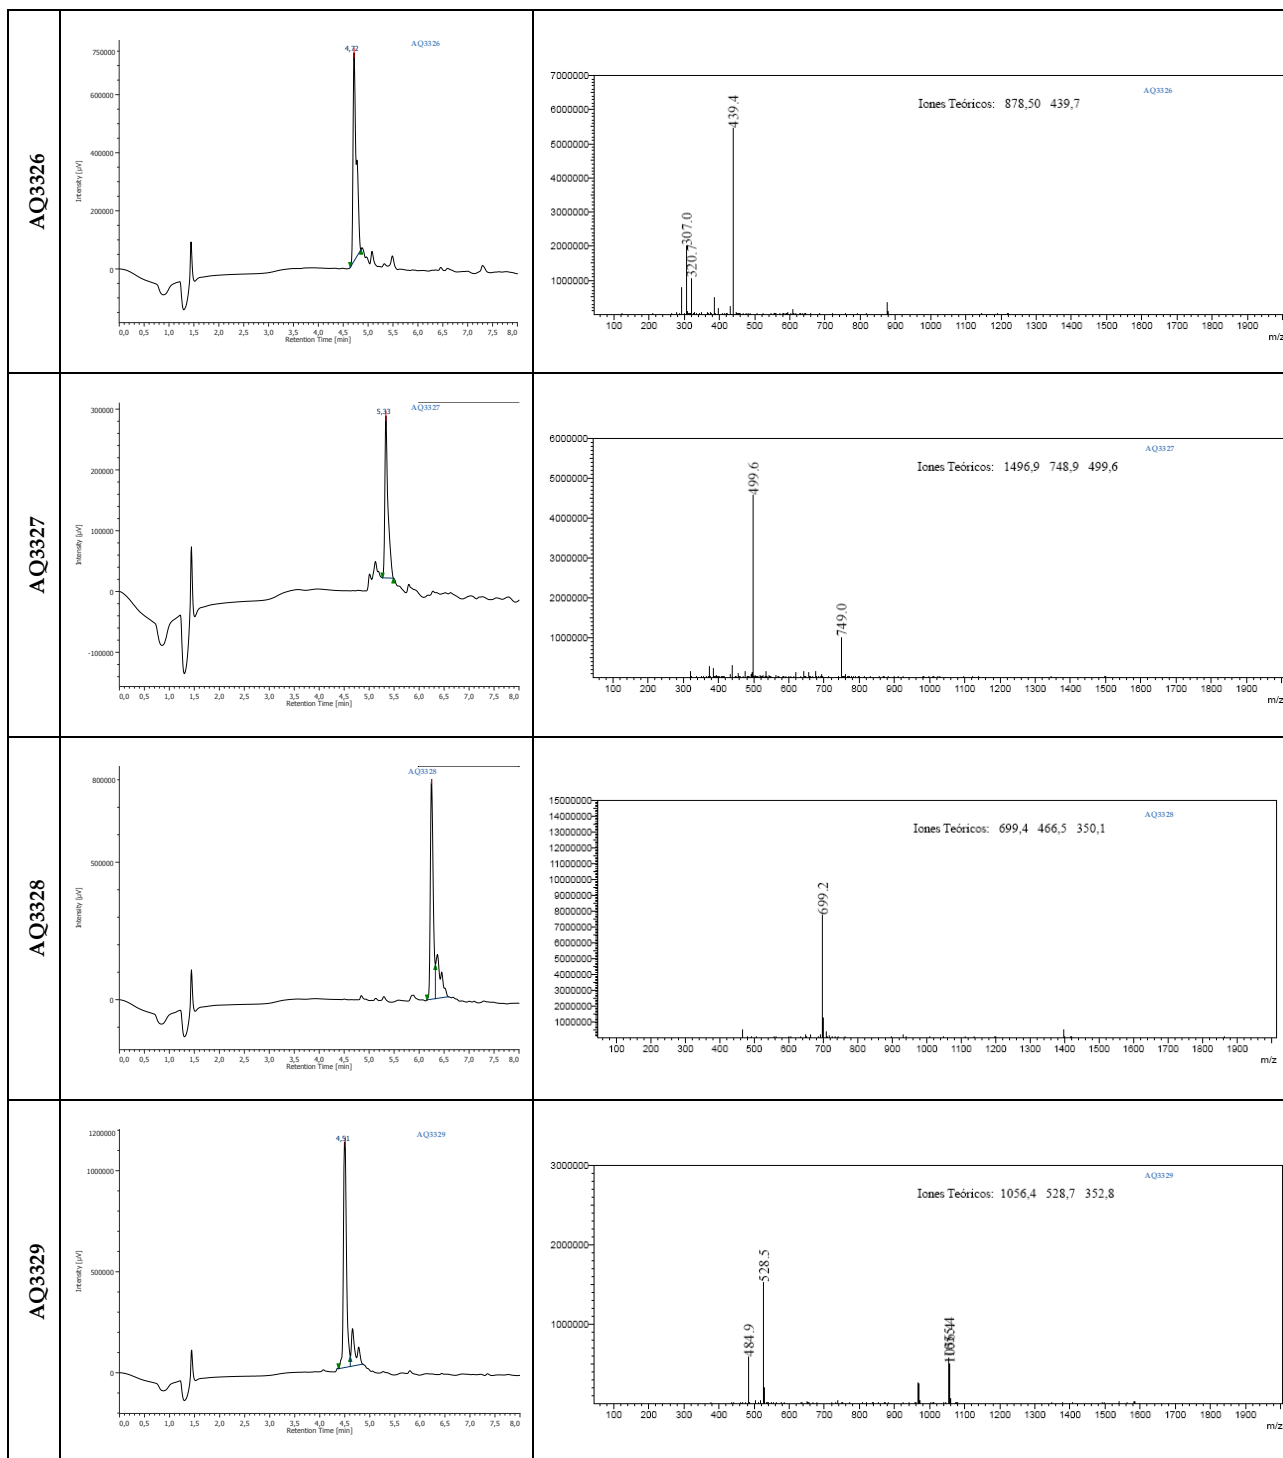

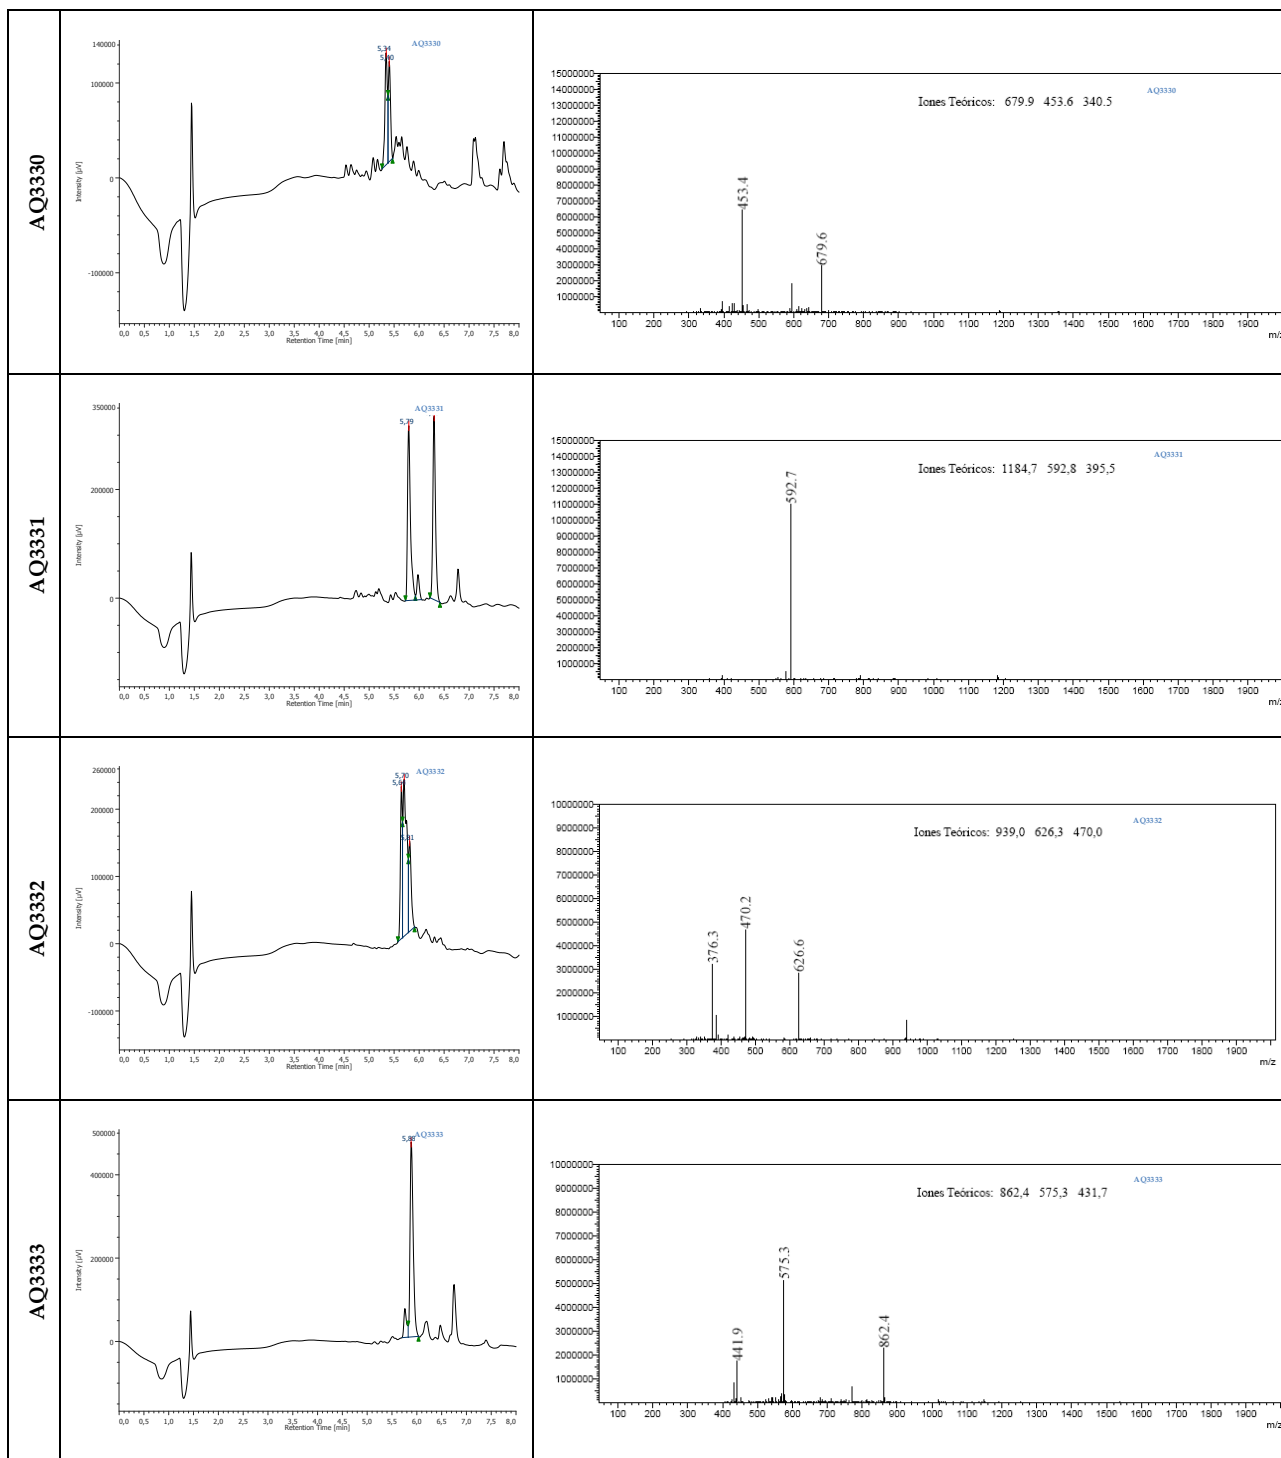

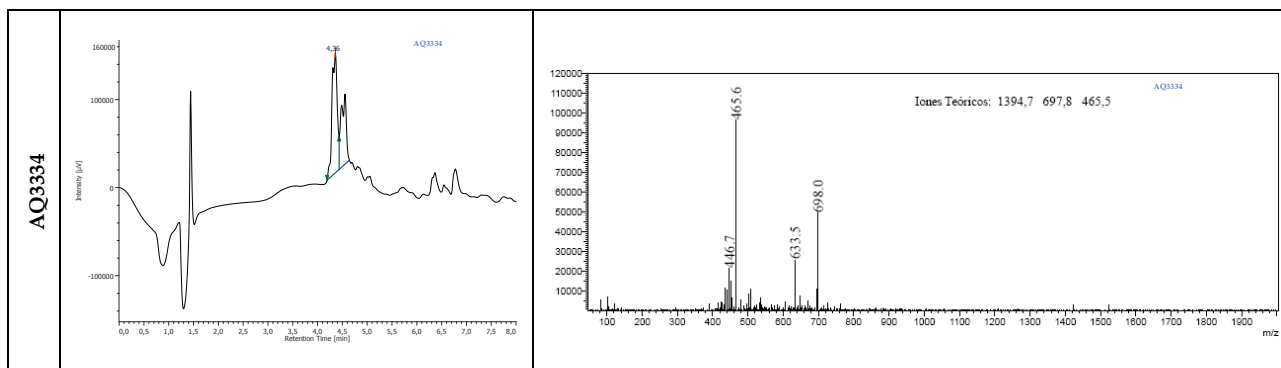

**Table S2.** Descriptors calculated for each peptide sequence [16].

| Descriptor        | Label   | Definition                                                                                                     |
|-------------------|---------|----------------------------------------------------------------------------------------------------------------|
| Aliphatic index   | alIndex | Defined as the relative volume of the aliphatic side chains (A. I. L. V)                                       |
| Boman Index       | Boman   | Potential protein interaction index. Could be associated with the potential to bind to membranes or receptors. |
| Charge            | Charge  | Theoretical net charge.                                                                                        |
| Hydrophobicity    | Hphob   | Gravy hydrophobicity index using Kidera scale.                                                                 |
| Isoelectric point | pI      | Isoelectric point using EMBOSS PKscale.                                                                        |
| Length            | Length  | Counts the number of amino acids.                                                                              |
| Molecular Weight  | MW      | Computes the molecular weight using the scales from EXpasy.                                                    |

**Table S3.** Original variables calculated for each peptide sequence.

| #      | Sequence             | aIndex | Boman | Charge | Hphob | pI    | length | MW      |
|--------|----------------------|--------|-------|--------|-------|-------|--------|---------|
| AQ3283 | DLKTQVKVFA           | 107.00 | 1.01  | 1.00   | 0.23  | 9.54  | 10.00  | 1148.37 |
| AQ3284 | VWRSTSPAKESPDELSRY   | 43.33  | 3.39  | 0.00   | 0.31  | 6.58  | 18.00  | 2108.30 |
| AQ3285 | ITNYLHKTLAHVPEI      | 130.00 | 0.54  | 0.18   | -0.01 | 7.70  | 15.00  | 1749.04 |
| AQ3286 | TFSSKVQYQLVVTTLHKLQE | 102.00 | 1.20  | 1.09   | 0.22  | 9.26  | 20.00  | 2349.71 |
| AQ3287 | RDQLPHPLKEFLQE       | 83.57  | 2.92  | -0.91  | 0.21  | 5.55  | 14.00  | 1749.99 |
| AQ3288 | SMHKPLPKTLSSV        | 82.31  | 0.95  | 2.09   | 0.06  | 10.81 | 13.00  | 1424.72 |
| AQ3289 | EKTVIGYLEPGAE        | 90.00  | 0.86  | -2.00  | 0.13  | 3.98  | 13.00  | 1405.57 |
| AQ3290 | LQRSLSPTQLYYRQFTSKV  | 76.84  | 2.41  | 3.00   | 0.22  | 10.65 | 19.00  | 2315.66 |
| AQ3291 | ELDSIPEKLLD          | 141.82 | 1.85  | -3.00  | 0.11  | 3.74  | 11.00  | 1271.43 |
| AQ3292 | SLIRLGAFYKRVKE       | 104.00 | 1.59  | 3.00   | 0.10  | 10.89 | 15.00  | 1827.20 |
| AQ3293 | QLRKVLSL             | 182.50 | 1.33  | 2.00   | 0.17  | 11.65 | 8.00   | 956.20  |
| AQ3294 | FYPSIQLPAHIQEYLSDS   | 92.22  | 0.96  | -1.91  | -0.13 | 4.18  | 18.00  | 2108.33 |
| AQ3295 | EAELSSDKLTISPE       | 90.71  | 2.21  | -3.00  | 0.28  | 3.78  | 14.00  | 1518.64 |
| AQ3296 | DLASKRAVDF           | 88.00  | 2.58  | 0.00   | 0.21  | 6.45  | 10.00  | 1121.26 |
| AQ3297 | AVGKSSLVLRVFKG       | 125.00 | 0.30  | 3.00   | 0.05  | 11.82 | 14.00  | 1460.78 |
| AQ3298 | RGAQAAIVVYD          | 115.45 | 0.90  | 0.00   | 0.06  | 6.33  | 11.00  | 1162.31 |
| AQ3299 | NNRLPLLGGKYIQK       | 120.00 | 1.87  | 3.00   | 0.19  | 10.90 | 13.00  | 1556.87 |
| AQ3300 | LNEKVSNLQRRVDA       | 104.29 | 3.82  | 1.00   | 0.52  | 9.69  | 14.00  | 1641.85 |
| AQ3301 | SLRDLVSRKYLHLKNIP    | 131.76 | 2.31  | 3.09   | 0.18  | 10.89 | 17.00  | 2052.45 |
| AQ3302 | NEDVLDQVEQSLLGVHG    | 120.00 | 1.65  | -3.91  | 0.17  | 3.74  | 17.00  | 1851.99 |
| AQ3303 | VREQLQIFLR           | 146.00 | 2.60  | 1.00   | 0.23  | 10.40 | 10.00  | 1301.55 |
| AQ3304 | LKRKRAVLKSYLSTSVR    | 108.82 | 2.92  | 6.00   | 0.45  | 12.27 | 17.00  | 2005.44 |
| AQ3305 | SDSSVEVLAELIKHRV     | 125.88 | 2.11  | -1.91  | 0.29  | 4.58  | 17.00  | 1911.14 |
| AQ3306 | LKEISLKGNSLS         | 130.00 | 1.18  | 1.00   | 0.20  | 9.54  | 12.00  | 1288.51 |
| AQ3307 | TIPKLFQLQD           | 117.00 | 1.02  | 0.00   | 0.02  | 6.34  | 10.00  | 1202.42 |
| AQ3308 | QLDYNVYGDVGVEQ       | 90.00  | 1.67  | -3.00  | 0.15  | 3.38  | 14.00  | 1598.69 |
| AQ3309 | AKLEVEHLKLTYSNI      | 130.00 | 1.11  | 0.09   | 0.17  | 7.54  | 15.00  | 1758.05 |
| AQ3310 | IEKGIQSEHFQKIALF     | 103.75 | 0.97  | 0.09   | 0.12  | 7.55  | 16.00  | 1888.20 |
| AQ3311 | KLKPKVKQKSIRI        | 112.31 | 2.52  | 6.00   | 0.62  | 12.05 | 13.00  | 1566.01 |
| AQ3312 | HTGSVRSLSN           | 68.00  | 2.91  | 1.09   | 0.32  | 10.55 | 10.00  | 1057.13 |
| AQ3313 | SPTDVHKQYAIVFKTPPYHS | 53.50  | 1.46  | 1.18   | 0.07  | 9.13  | 20.00  | 2315.61 |
| AQ3314 | QQHKVLDKLNHLSQTP     | 91.25  | 2.47  | 1.18   | 0.34  | 9.54  | 16.00  | 1886.14 |
| AQ3315 | TPFDLTKSQKVRDLLDP    | 85.88  | 2.62  | 0.00   | 0.23  | 6.52  | 17.00  | 1973.26 |
| AQ3316 | GLNLAAHYNVFVEVVLAD   | 146.11 | -0.37 | -1.91  | -0.22 | 4.18  | 18.00  | 1944.22 |
| AQ3317 | KYQPRHLHIVEVTE       | 104.62 | 2.24  | 0.09   | 0.30  | 7.54  | 13.00  | 1611.86 |
| AQ3318 | RPSPPAFADDQLAASK     | 49.38  | 2.19  | 0.00   | 0.08  | 6.45  | 16.00  | 1670.84 |
| AQ3319 | YFKLENIYVKELSVGR     | 109.38 | 1.45  | 1.00   | 0.15  | 9.12  | 16.00  | 1958.29 |
| AQ3320 | GSVGLPLLKSDDIKLVNT   | 140.56 | 0.56  | 0.00   | 0.01  | 6.45  | 18.00  | 1869.19 |
| AQ3321 | TPVKSSKLDVFSEVYS     | 78.75  | 1.43  | 0.00   | 0.17  | 6.49  | 16.00  | 1786.01 |
| AQ3322 | DPGLVSAFPVSGSVQTE    | 75.56  | 0.93  | -2.00  | 0.00  | 3.55  | 18.00  | 1803.94 |

|        |                 |        |       |       |       |       |       |         |
|--------|-----------------|--------|-------|-------|-------|-------|-------|---------|
| AQ3323 | TTAYFQSSYLKS    | 40.83  | 1.42  | 1.00  | 0.12  | 9.15  | 12.00 | 1395.53 |
| AQ3324 | SNQKVLRESEA     | 70.91  | 3.85  | 0.00  | 0.63  | 6.53  | 11.00 | 1260.37 |
| AQ3325 | NDTVSAPSQP      | 39.00  | 2.44  | -1.00 | 0.20  | 3.75  | 10.00 | 1015.04 |
| AQ3326 | RPSRYLS         | 55.71  | 4.55  | 2.00  | 0.31  | 11.15 | 7.00  | 878.00  |
| AQ3327 | NLIKSKRIGQVLQ   | 142.31 | 1.73  | 3.00  | 0.34  | 11.82 | 13.00 | 1496.82 |
| AQ3328 | TPSLLSPILQNNQ   | 120.00 | 0.83  | 0.00  | -0.05 | 6.10  | 13.00 | 1397.59 |
| AQ3329 | SPSESYSVSN      | 29.00  | 2.66  | -1.00 | 0.24  | 3.85  | 10.00 | 1056.05 |
| AQ3330 | AIRSLSLQKTQL    | 138.33 | 1.62  | 2.00  | 0.24  | 11.65 | 12.00 | 1357.62 |
| AQ3331 | QAVAAAVASKIVG   | 135.38 | -0.96 | 1.00  | -0.02 | 9.70  | 13.00 | 1184.40 |
| AQ3332 | KSRFTVKPYIKRLQL | 97.33  | 2.42  | 5.00  | 0.33  | 11.77 | 15.00 | 1877.31 |
| AQ3333 | ARDFVEKAFRDGLIS | 84.67  | 2.58  | 0.00  | 0.19  | 6.56  | 15.00 | 1723.95 |
| AQ3334 | KGSESQKSSQTLD   | 30.00  | 3.69  | 0.00  | 0.66  | 6.49  | 13.00 | 1394.46 |

**Table S4.** Importance of components.

|                        | PC1    | PC2    | PC3    | PC4            | PC5     | PC6     | PC7     |
|------------------------|--------|--------|--------|----------------|---------|---------|---------|
| Standard deviation     | 1.5771 | 1.3903 | 1.3226 | 0.75170        | 0.41894 | 0.26349 | 0.14319 |
| Proportion of Variance | 0.3553 | 0.2761 | 0.2499 | 0.08072        | 0.02507 | 0.00992 | 0.00293 |
| Cumulative Proportion  | 0.3553 | 0.6314 | 0.8814 | <b>0.96208</b> | 0.9871  | 0.99707 | 1.00000 |

**Table S5.** Absolute values for the PCA factor loadings. Loadings are in scale of red to blue from higher to lower values.

|        | PC1  |        | PC2  |        | PC3  |        | PC4  |
|--------|------|--------|------|--------|------|--------|------|
| Hphob  | 0,51 | Charge | 0,52 | aIndex | 0,52 | aIndex | 0,77 |
| Boman  | 0,45 | pI     | 0,50 | MW     | 0,45 | Hphob  | 0,46 |
| Charge | 0,39 | MW     | 0,46 | Boman  | 0,44 | Charge | 0,29 |
| pI     | 0,38 | length | 0,41 | length | 0,43 | Boman  | 0,24 |
| length | 0,37 | aIndex | 0,28 | Hphob  | 0,31 | pI     | 0,20 |
| MW     | 0,29 | Boman  | 0,15 | pI     | 0,22 | MW     | 0,12 |
| aIndex | 0,13 | Hphob  | 0,01 | Charge | 0,12 | length | 0,05 |



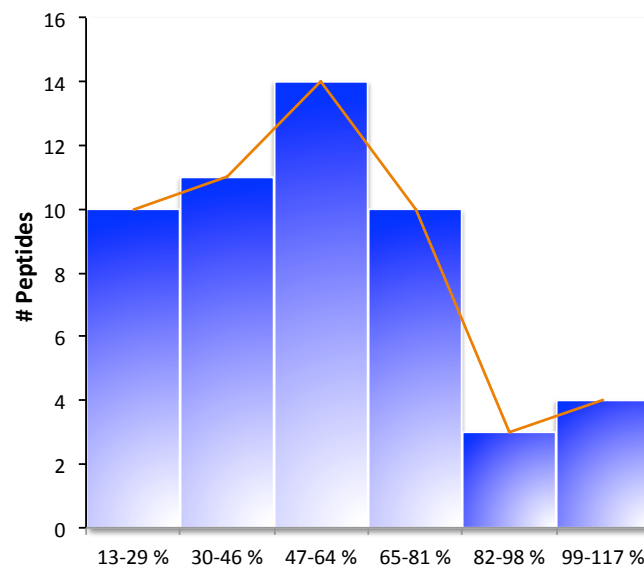

**Figure S1.** Number of peptides grouped by frequency according to the obtained pure yield.
