# Supplementary material for: Tea Bags for Fmoc Solid-Phase Peptide Synthesis: An Example of Circular Economy
Source: MDPI journal article supplement (doi:10.3390/molecules26165035), 2021-08-19
Supplement: s1 [file s1]

Synthesis Name: S14062019

Amount of Synthesis: 40 mg.

Deprotection Method: 4MP 20% TritonX100 1%/DMF

Number of Peptides: 52

Number of families: 22

-

| Bag                            | Size | Pos. | M.W.    | Family   |
|--------------------------------|------|------|---------|----------|
| 1                              | 10   | 442  | 1148.5  | RAG-1    |
| Sequence: DLKTQVKVFA           |      |      |         |          |
| 2                              | 18   | 927  | 2108.52 | RAG-1    |
| Sequence: VWRSTSPAKESPDELSRY   |      |      |         |          |
| 3                              | 15   | 967  | 1749.26 | RAG-1    |
| Sequence: ITNYLHKTLAHVPEI      |      |      |         |          |
| 4                              | 20   | 28   | 2350    | SOCS3    |
| Sequence: TFSSKVQYQLVVTTLHKLQE |      |      |         |          |
| 5                              | 14   | 194  | 1750.17 | SOCS3    |
| Sequence: RDQLPHPLKEFLQE       |      |      |         |          |
| 6                              | 13   | 1    | 1424.89 | IFNRa/b2 |
| Sequence: SMHKPLPKTLSSV        |      |      |         |          |
| 7                              | 13   | 177  | 1405.75 | IFNRa/b2 |
| Sequence: EKTIVIGYLEPGAE       |      |      |         |          |
| 8                              | 19   | 142  | 2315.91 | IFNRa/b2 |
| Sequence: LQRSLSPQTQLYYRQFTSKV |      |      |         |          |
| 9                              | 11   | 31   | 1271.56 | IFIT5    |
| Sequence: ELDSIPEKLLD          |      |      |         |          |
| 10                             | 15   | 146  | 1827.4  | IFIT5    |
| Sequence: SLIRLGAFYKRVKE       |      |      |         |          |
| 11                             | 8    | 205  | 956.29  | IFIT5    |
| Sequence: QLRKVLSL             |      |      |         |          |
| 12                             | 18   | 267  | 2108.58 | IFNR1B   |
| Sequence: FYPSIQLPAHIQEYLSDS   |      |      |         |          |
| 13                             | 14   | 299  | 1518.81 | IFNR1B   |
| Sequence: EAELSSDKLTISPE       |      |      |         |          |
| 14                             | 10   | 1    | 1121.37 | RAB5     |
| Sequence: DLASKRAVDF           |      |      |         |          |
| 15                             | 14   | 1    | 1460.97 | RAB5     |
| Sequence: AVGKSSLVLRVFKG       |      |      |         |          |
| 16                             | 11   | 1    | 1162.46 | RAB5     |
| Sequence: RGAQAIVVYD           |      |      |         |          |

17 13 1 1557.05 TLR4  
Sequence: NNRLPLLGYIQK

18 14 1 1642.03 MCR2  
Sequence: LNEKVSNLQRRVDA

19 17 227 2052.67 NLRX-1  
Sequence: SLRDLVSRKYLHLKNIP

20 17 612 1852.23 NLRX-1  
Sequence: NEDVLDQVEQSLLGVHG

21 10 956 1301.69 NLRX-1  
Sequence: VREQQLQIFLR

22 17 613 2005.65 NOD-1  
Sequence: LKRKRAVLKSYLSTSVR

23 17 742 1911.37 NOD-1  
Sequence: SDSSVEVLAEELIKHRV

24 12 927 1288.66 NOD-1  
Sequence: LKEISLKGNSLS

25 10 613 1202.55 NOD-2  
Sequence: TIPKLFQLQD

26 14 781 1598.89 NOD-2  
Sequence: QLDYNYVGDVGV EQ

27 15 745 1758.25 NOD-2  
Sequence: AKLEVEHLKLTYSNI

28 16 821 1888.44 NOD-2  
Sequence: IEKGIQSEHFQKIALF

29 13 235 1566.2 GPR-18  
Sequence: KLKPKVKQKSIRI

30 10 333 1057.26 GPR-18  
Sequence: HTGSVRSLSN

31 20 284 2315.9 NF-Kb  
Sequence: SPTDVHKQYAIVFKTPPYHS

32 16 512 1886.37 F-kb  
Sequence: QQHKVLDKLNHLSQTP

33 17 747 1973.47 F-kb  
Sequence: TPFDLTKSQKVRDLLDP

34 18 247 1944.46 EOMES  
Sequence: GLNLAAHYNVFVEVVLAD

35 13 336 1612.05 EOMES  
Sequence: KYQPRLHIVEVTE

36 17 1 1742.12 EOMES  
Sequence: RPSPPAFADDQLAASAK

37 16 69 1958.51 1  
Sequence: YFKLENIYVKELSVGR

38        18        405        1869.43 1  
Sequence: GSVGLPLLKSDDIKLVNT

39        16        102        1786.22 protein-like  
Sequence: TPVKSSKLDVFSEVYS

40        18        173        1804.19 IL12R  
Sequence: DPGLVSANFPVSGSVQTE

41        12        743        1395.68 IL12R  
Sequence: TTAYFQSSYLKS

42        11        71        1260.51 TNFR  
Sequence: SNQKVLRESEA

43        10        1        1015.17 TNFR  
Sequence: NDTVSAAPSQP

44        7        1        878.07 TNFR  
Sequence: RPSRYLS

45        13        65        1497.01 IL15R  
Sequence: NLIKSKRIGQVLQ

46        13        124        1397.76 IL15R  
Sequence: TPSSLLSPILQNQ

47        10        256        1056.17 IL15R  
Sequence: SPSESYSVSN

48        12        258        1357.77 TLR3  
Sequence: AIRSLSLQKTQL

49        13        29        1184.58 PSMA7  
Sequence: QAVAAAVASKIVG

50        15        54        1877.51 PSMA7  
Sequence: KSRFTVKPYIKRLQL

51        15        99        1724.14 1  
Sequence: ARDFVEKAFRDGLIS

52        13        1        1394.63 1  
Sequence: KGSESQKSSQTLD

|    |                      |
|----|----------------------|
| 1  | DLKTQVKVFA           |
| 2  | VWRSTSPAKESPDELSRY   |
| 3  | ITNYLHKTLAHVPEI      |
| 4  | TFSSKVQYQLVVTTLHKLQE |
| 5  | RDQLPHPLKEFLQE       |
| 6  | SMHKPLPKTLSSV        |
| 7  | EKTVIGYLEPGAE        |
| 8  | LQRSLSPTQLYYRQFTSKV  |
| 9  | ELDSIPEKLLD          |
| 10 | SLIRLGAFFYKRVKE      |
| 11 | QLRKVLSL             |
| 12 | FYPSIQLPAAHIQEYLSDS  |
| 13 | EAELSSDKLTISPE       |
| 14 | DLASKRAVDF           |
| 15 | AVGKSSLVLRFVKG       |
| 16 | RGAQAAIVVYD          |
| 17 | NNRLPLLGGYIQK        |
| 18 | LNEKVSNLQRRVDA       |
| 19 | SLRDLVSRKYLHLKNIP    |
| 20 | NEDVLDQVEQSLLGVHG    |
| 21 | VREQLQIFLR           |
| 22 | LKRKRAVLKSYLSTSVR    |
| 23 | SDSSVEVLAEELIKHRV    |
| 24 | LKEISLKGNSLS         |
| 25 | TIPKLFQLQD           |
| 26 | QLDYNVVGDVGEQ        |
| 27 | AKLEVEHLKLTYSNI      |
| 28 | IEKGIQSEHFQKIALF     |
| 29 | KLKPKVKQKSIRI        |
| 30 | HTGSVRSLSN           |
| 31 | SPTDVHKQYAIVFKTPPYHS |
| 32 | QQHKVLDKLNHLSQTP     |

|    |                    |
|----|--------------------|
| 33 | TPFDLTKSQKVRDLLDP  |
| 34 | GLNLAAHYNVFVEVVLAD |
| 35 | KYQPRLHIVEVTE      |
| 36 | RPSPPAFADDQLAASAK  |
| 37 | YFKLENIYVKELSVGR   |
| 38 | GSVGLPLLKSDDIKLVNT |
| 39 | TPVKSSKLDVFSEVYS   |
| 40 | DPGLVSANFPVSGSVQTE |
| 41 | TTAYFQSSYLKS       |
| 42 | SNQKVLRESEA        |
| 43 | NDTVSAPSQP         |
| 44 | RPSRYLS            |
| 45 | NLIKSKRIGQVLQ      |
| 46 | TPSSLLSPILQNQ      |
| 47 | SPSESYSVSN         |
| 48 | AIRSLSLQKTQL       |
| 49 | QAVAAAVASKIVG      |
| 50 | KSFRFTVKPYIKRLQL   |
| 51 | ARDFVEKAFRDGLIS    |
| 52 | KGSESQKSSQTLD      |

## TOTAL OF AMINO ACIDS FOR SYNTHESIS

|     |    |          |
|-----|----|----------|
| ALA | 39 | RESIDUOS |
| ARG | 37 | RESIDUOS |
| ASN | 22 | RESIDUOS |
| ASP | 34 | RESIDUOS |
| CYS | 0  | RESIDUOS |
| PHE | 24 | RESIDUOS |
| GLY | 24 | RESIDUOS |
| GLU | 41 | RESIDUOS |
| GLN | 47 | RESIDUOS |
| HIS | 18 | RESIDUOS |
| ILE | 32 | RESIDUOS |
| LEU | 96 | RESIDUOS |
| LYS | 66 | RESIDUOS |
| MET | 1  | RESIDUOS |
| PRO | 38 | RESIDUOS |
| SER | 86 | RESIDUOS |
| TYR | 28 | RESIDUOS |
| THR | 32 | RESIDUOS |
| TRP | 1  | RESIDUOS |
| VAL | 65 | RESIDUOS |

## AMOUNT OF AMINO ACIDS FROM COUPLING 1 TO 10

|     |    |          |
|-----|----|----------|
| ALA | 31 | RESIDUES |
| ARG | 27 | RESIDUES |
| ASN | 18 | RESIDUES |
| ASP | 22 | RESIDUES |
| CYS | 0  | RESIDUES |
| PHE | 17 | RESIDUES |
| GLY | 15 | RESIDUES |
| GLU | 26 | RESIDUES |
| GLN | 32 | RESIDUES |
| HIS | 11 | RESIDUES |
| ILE | 18 | RESIDUES |
| LEU | 70 | RESIDUES |
| LYS | 52 | RESIDUES |
| MET | 1  | RESIDUES |
| PRO | 30 | RESIDUES |
| SER | 63 | RESIDUES |
| TYR | 20 | RESIDUES |
| THR | 21 | RESIDUES |
| TRP | 1  | RESIDUES |
| VAL | 40 | RESIDUES |
| OUT | 9  | RESIDUES |

## AMOUNT OF AMINO ACIDS FROM COUPLING 11 TO 20

|     |    |          |
|-----|----|----------|
| ALA | 8  | RESIDUES |
| ARG | 10 | RESIDUES |
| ASN | 4  | RESIDUES |
| ASP | 12 | RESIDUES |
| CYS | 0  | RESIDUES |
| PHE | 7  | RESIDUES |
| GLY | 9  | RESIDUES |
| GLU | 15 | RESIDUES |
| GLN | 15 | RESIDUES |
| HIS | 7  | RESIDUES |
| ILE | 14 | RESIDUES |
| LEU | 26 | RESIDUES |
| LYS | 14 | RESIDUES |
| MET | 0  | RESIDUES |
| PRO | 8  | RESIDUES |
| SER | 23 | RESIDUES |
| TYR | 8  | RESIDUES |
| THR | 11 | RESIDUES |
| TRP | 0  | RESIDUES |
| VAL | 25 | RESIDUES |
| OUT | 43 | RESIDUES |



## COUPLING NUMBER 1

ALA: 1 18 42 =**3**  
 ASP: 9 16 25 34 52 =**5**  
 GLU: 4 5 7 10 13 35 40 =**7**  
 PHE: 14 28 =**2**  
 GLY: 15 20 49 =**3**  
 ILE: 3 27 29 =**3**  
 LYS: 17 36 =**2**  
 LEU: 11 48 50 =**3**  
 ASN: 30 47 =**2**  
 PRO: 19 32 33 43 =**4**  
 GLN: 26 45 46 =**3**  
 ARG: 21 22 37 =**3**  
 SER: 12 24 31 39 41 44 51 =**7**  
 THR: 38 =**1**  
 VAL: 6 8 23 =**3**  
 TYR: 2 =**1**

DEPROTECTION      DATE \_\_\_\_/\_\_\_\_/\_\_\_\_      CHECK      MADE BY      REVIEWED BY

4MP 20% TritonX100 1%/DMF (2x1')  | \_\_\_\_ | \_\_\_\_ | \_\_\_\_\_

Wash DMF (3x1')  | \_\_\_\_ | \_\_\_\_ | \_\_\_\_\_

Wash IPA (1x1') | \_\_\_\_\_

Wash BPB 1%/DMF (1x2') | \_\_\_\_\_

Wash DMF (2x1')  | \_\_\_\_ | \_\_\_\_ | \_\_\_\_\_

Wash DCM (1x1') | \_\_\_\_\_

Coupling Cycle      DATE      HOUR      MADE BY      REVIEWED BY

AA+HBTU+OXYMA+DIPEA

Single (5:5:5:7,5) | \_\_\_\_/\_\_\_\_/\_\_\_\_ | \_\_\_\_:\_\_\_\_ | \_\_\_\_:\_\_\_\_ | \_\_\_\_\_

AA+HCTU+OXYMA+DIPEA

Double (5:5:5:7,5)  | \_\_\_\_/\_\_\_\_/\_\_\_\_ | \_\_\_\_:\_\_\_\_ | \_\_\_\_:\_\_\_\_ | \_\_\_\_\_

AA+DIC+OXYMA

Triple (5:5:5)  | \_\_\_\_/\_\_\_\_/\_\_\_\_ | \_\_\_\_:\_\_\_\_ | \_\_\_\_:\_\_\_\_ | \_\_\_\_\_

After coupling cycle, before checking the BPB test, wash DMF (2x1') 

1:ALA    16:ASP    31:SER    46:GLN  
 2:TYR    17:LYS    32:PRO    47:ASN  
 3:ILE    18:ALA    33:PRO    48:LEU  
 4:GLU    19:PRO    34:ASP    49:GLY  
 5:GLU    20:GLY    35:GLU    50:LEU  
 6:VAL    21:ARG    36:LYS    51:SER  
 7:GLU    22:ARG    37:ARG    52:ASP  
 8:VAL    23:VAL    38:THR  
 9:ASP    24:SER    39:SER  
 10:GLU    25:ASP    40:GLU  
 11:LEU    26:GLN    41:SER  
 12:SER    27:ILE    42:ALA  
 13:GLU    28:PHE    43:PRO  
 14:PHE    29:ILE    44:SER  
 15:GLY    30:ASN    45:GLN

## COUPLING NUMBER 2

ALA: 7 34 36 =**3**  
 ASP: 12 14 18 33 =**4**  
 GLU: 3 26 42 =**3**  
 PHE: 1 =**1**  
 GLY: 37 =**1**  
 HIS: 20 31 =**2**  
 ILE: 19 51 =**2**  
 LYS: 8 10 15 41 =**4**  
 LEU: 9 21 24 28 44 45 52 =**7**  
 ASN: 27 38 46 =**3**  
 PRO: 13 =**1**  
 GLN: 4 5 17 25 43 48 50 =**7**  
 ARG: 2 23 29 =**3**  
 SER: 6 11 30 47 =**4**  
 THR: 32 35 40 =**3**  
 VAL: 22 49 =**2**  
 TYR: 16 39 =**2**

DEPROTECTION      DATE \_\_\_\_/\_\_\_\_/\_\_\_\_      CHECK      MADE BY      REVIEWED BY

4MP 20% TritonX100 1%/DMF (2x1')  | \_\_\_\_ | \_\_\_\_ | \_\_\_\_ | \_\_\_\_

Wash DMF (3x1')  | \_\_\_\_ | \_\_\_\_ | \_\_\_\_ | \_\_\_\_

Wash IPA (1x1') | \_\_\_\_ | \_\_\_\_ | \_\_\_\_ | \_\_\_\_

Wash BPB 1%/DMF (1x2') | \_\_\_\_ | \_\_\_\_ | \_\_\_\_ | \_\_\_\_

Wash DMF (2x1')  | \_\_\_\_ | \_\_\_\_ | \_\_\_\_ | \_\_\_\_

Wash DCM (1x1') | \_\_\_\_ | \_\_\_\_ | \_\_\_\_ | \_\_\_\_

Coupling Cycle      DATE      HOUR      MADE BY      REVIEWED BY

AA+HBTU+OXYMA+DIPEA

Single (5:5:5:7,5) | \_\_\_\_/\_\_\_\_/\_\_\_\_ | \_\_\_\_:\_\_\_\_ | \_\_\_\_:\_\_\_\_ | \_\_\_\_

AA+HCTU+OXYMA+DIPEA

Double (5:5:5:7,5)  | \_\_\_\_/\_\_\_\_/\_\_\_\_ | \_\_\_\_:\_\_\_\_ | \_\_\_\_:\_\_\_\_ | \_\_\_\_

AA+DIC+OXYMA

Triple (5:5:5)  | \_\_\_\_/\_\_\_\_/\_\_\_\_ | \_\_\_\_:\_\_\_\_ | \_\_\_\_:\_\_\_\_ | \_\_\_\_

After coupling cycle, before checking the BPB test, wash DMF (2x1') 

1:PHE    16:TYR    31:HIS    46:ASN  
 2:ARG    17:GLN    32:THR    47:SER  
 3:GLU    18:ASP    33:ASP    48:GLN  
 4:GLN    19:ILE    34:ALA    49:VAL  
 5:GLN    20:HIS    35:THR    50:GLN  
 6:SER    21:LEU    36:ALA    51:ILE  
 7:ALA    22:VAL    37:GLY    52:LEU  
 8:LYS    23:ARG    38:ASN  
 9:LEU    24:LEU    39:TYR  
 10:LYS    25:GLN    40:THR  
 11:SER    26:GLU    41:LYS  
 12:ASP    27:ASN    42:GLU  
 13:PRO    28:LEU    43:GLN  
 14:ASP    29:ARG    44:LEU  
 15:LYS    30:SER    45:LEU

## COUPLING NUMBER 3

ALA: 28 =**1**  
 PHE: 21 =**1**  
 GLY: 7 =**1**  
 HIS: 23 =**1**  
 ILE: 17 29 49 =**3**  
 LEU: 4 5 9 11 25 30 33 34 41 50 51 =**11**  
 ASN: 19 =**1**  
 PRO: 3 =**1**  
 GLN: 32 40 46 =**3**  
 SER: 2 6 8 12 13 22 24 27 36 42 43 =**11**  
 THR: 48 52 =**2**  
 VAL: 1 10 14 15 16 18 20 26 35 37 38 39 45 47 =**14**  
 TYR: 31 44 =**2**

DEPROTECTION      DATE \_\_\_\_/\_\_\_\_/\_\_\_\_      CHECK      MADE BY      REVIEWED BY

4MP 20% TritonX100 1%/DMF (2x10')  | \_\_\_\_ | \_\_\_\_ | \_\_\_\_

Wash DMF (3x1')  | \_\_\_\_ | \_\_\_\_ | \_\_\_\_

Wash IPA (1x1') | \_\_\_\_ | \_\_\_\_ | \_\_\_\_

Wash BPB 1%/DMF (1x2') | \_\_\_\_ | \_\_\_\_ | \_\_\_\_

Wash DMF (2x1')  | \_\_\_\_ | \_\_\_\_ | \_\_\_\_

Wash DCM (1x1') | \_\_\_\_ | \_\_\_\_ | \_\_\_\_

Coupling Cycle      DATE      HOUR      MADE BY      REVIEWED BY

AA+HBTU+OXYMA+DIPEA

Single (5:5:5:7,5) | \_\_\_\_/\_\_\_\_/\_\_\_\_ | \_\_\_\_:\_\_\_\_ | \_\_\_\_:\_\_\_\_ | \_\_\_\_

AA+HCTU+OXYMA+DIPEA

Double (5:5:5:7,5)  | \_\_\_\_/\_\_\_\_/\_\_\_\_ | \_\_\_\_:\_\_\_\_ | \_\_\_\_:\_\_\_\_ | \_\_\_\_

AA+DIC+OXYMA

Triple (5:5:5)  | \_\_\_\_/\_\_\_\_/\_\_\_\_ | \_\_\_\_:\_\_\_\_ | \_\_\_\_:\_\_\_\_ | \_\_\_\_

After coupling cycle, before checking the BPB test, wash DMF (2x1') 

|        |        |        |        |
|--------|--------|--------|--------|
| 1:VAL  | 16:VAL | 31:TYR | 46:GLN |
| 2:SER  | 17:ILE | 32:GLN | 47:VAL |
| 3:PRO  | 18:VAL | 33:LEU | 48:THR |
| 4:LEU  | 19:ASN | 34:LEU | 49:ILE |
| 5:LEU  | 20:VAL | 35:VAL | 50:LEU |
| 6:SER  | 21:PHE | 36:SER | 51:LEU |
| 7:GLY  | 22:SER | 37:VAL | 52:THR |
| 8:SER  | 23:HIS | 38:VAL |        |
| 9:LEU  | 24:SER | 39:VAL |        |
| 10:VAL | 25:LEU | 40:GLN |        |
| 11:LEU | 26:VAL | 41:LEU |        |
| 12:SER | 27:SER | 42:SER |        |
| 13:SER | 28:ALA | 43:SER |        |
| 14:VAL | 29:ILE | 44:TYR |        |
| 15:VAL | 30:LEU | 45:VAL |        |

## COUPLING NUMBER 4

ALA: 14 36 =**2**  
 GLU: 35 39 42 =**3**  
 PHE: 5 15 =**2**  
 GLY: 20 26 51 =**3**  
 ILE: 13 21 28 =**3**  
 LYS: 1 4 9 19 23 48 49 =**7**  
 LEU: 2 6 12 33 38 46 =**6**  
 ASN: 24 =**1**  
 PRO: 7 31 43 =**3**  
 GLN: 25 45 52 =**3**  
 ARG: 10 18 44 50 =**4**  
 SER: 29 30 32 37 47 =**5**  
 THR: 8 22 =**2**  
 VAL: 3 11 16 34 40 =**5**  
 TYR: 17 27 41 =**3**

DEPROTECTION      DATE \_\_\_\_/\_\_\_\_/\_\_\_\_      CHECK      MADE BY      REVIEWED BY

4MP 20% TritonX100 1%/DMF(2x1') (C) |\_\_\_\_|\_\_\_\_|\_\_\_\_|\_\_\_\_|

Wash DMF(3x1') (C) |\_\_\_\_|\_\_\_\_|\_\_\_\_|\_\_\_\_|

Wash IPA(1x1') |\_\_\_\_|\_\_\_\_|\_\_\_\_|\_\_\_\_|

Wash BPB 1%/DMF(1x2') |\_\_\_\_|\_\_\_\_|\_\_\_\_|\_\_\_\_|

Wash DMF(2x1') (C) |\_\_\_\_|\_\_\_\_|\_\_\_\_|\_\_\_\_|

Wash DCM(1x1') |\_\_\_\_|\_\_\_\_|\_\_\_\_|\_\_\_\_|

Coupling Cycle      DATE      HOUR      MADE BY      REVIEWED BY

AA+HBTU+OXYMA+DIPEA

Single (5:5:5:7,5) |\_\_\_\_/\_\_\_\_/\_\_\_\_|\_\_\_\_:\_\_\_\_|\_\_\_\_:\_\_\_\_|\_\_\_\_|\_\_\_\_|

AA+HCTU+OXYMA+DIPEA

Double (5:5:5:7,5) (C) |\_\_\_\_/\_\_\_\_/\_\_\_\_|\_\_\_\_:\_\_\_\_|\_\_\_\_:\_\_\_\_|\_\_\_\_|\_\_\_\_|

AA+DIC+OXYMA

Triple (5:5:5) (C) |\_\_\_\_/\_\_\_\_/\_\_\_\_|\_\_\_\_:\_\_\_\_|\_\_\_\_:\_\_\_\_|\_\_\_\_|\_\_\_\_|

After coupling cycle, before checking the BPB test, wash DMF(2x1') (C)

1:LYS    16:VAL    31:PRO    46:LEU  
 2:LEU    17:TYR    32:SER    47:SER  
 3:VAL    18:ARG    33:LEU    48:LYS  
 4:LYS    19:LYS    34:VAL    49:LYS  
 5:PHE    20:GLY    35:GLU    50:ARG  
 6:LEU    21:ILE    36:ALA    51:GLY  
 7:PRO    22:THR    37:SER    52:GLN  
 8:THR    23:LYS    38:LEU  
 9:LYS    24:ASN    39:GLU  
 10:ARG    25:GLN    40:VAL  
 11:VAL    26:GLY    41:TYR  
 12:LEU    27:TYR    42:GLU  
 13:ILE    28:ILE    43:PRO  
 14:ALA    29:SER    44:ARG  
 15:PHE    30:SER    45:GLN

## COUPLING NUMBER 5

ALA: 36 43 =**2**  
 ASP: 33 51 =**2**  
 GLU: 2 5 7 9 =**4**  
 PHE: 8 25 =**2**  
 GLY: 24 45 =**2**  
 HIS: 3 4 =**2**  
 ILE: 16 23 46 =**3**  
 LYS: 10 11 17 28 29 38 50 =**7**  
 LEU: 19 20 32 37 =**4**  
 PRO: 31 =**1**  
 GLN: 21 48 =**2**  
 ARG: 14 15 18 30 42 =**5**  
 SER: 22 39 40 41 44 49 52 =**7**  
 THR: 6 13 27 =**3**  
 VAL: 1 26 34 35 =**4**  
 TYR: 12 47 =**2**

DEPROTECTION      DATE \_\_\_\_/\_\_\_\_/\_\_\_\_      CHECK      MADE BY      REVIEWED BY

4MP 20% TritonX100 1%/DMF (2x1')  | \_\_\_\_ | \_\_\_\_ | \_\_\_\_ | \_\_\_\_

Wash DMF (3x1')  | \_\_\_\_ | \_\_\_\_ | \_\_\_\_ | \_\_\_\_

Wash IPA (1x1') | \_\_\_\_ | \_\_\_\_ | \_\_\_\_ | \_\_\_\_

Wash BPB 1%/DMF (1x2') | \_\_\_\_ | \_\_\_\_ | \_\_\_\_ | \_\_\_\_

Wash DMF (2x1')  | \_\_\_\_ | \_\_\_\_ | \_\_\_\_ | \_\_\_\_

Wash DCM (1x1') | \_\_\_\_ | \_\_\_\_ | \_\_\_\_ | \_\_\_\_

Coupling Cycle      DATE      HOUR      MADE BY      REVIEWED BY

AA+HBTU+OXYMA+DIPEA

Single (5:5:5:7,5) | \_\_\_\_/\_\_\_\_/\_\_\_\_ | \_\_\_\_:\_\_\_\_ | \_\_\_\_:\_\_\_\_ | \_\_\_\_

AA+HCTU+OXYMA+DIPEA

Double (5:5:5:7,5)  | \_\_\_\_/\_\_\_\_/\_\_\_\_ | \_\_\_\_:\_\_\_\_ | \_\_\_\_:\_\_\_\_ | \_\_\_\_

AA+DIC+OXYMA

Triple (5:5:5)  | \_\_\_\_/\_\_\_\_/\_\_\_\_ | \_\_\_\_:\_\_\_\_ | \_\_\_\_:\_\_\_\_ | \_\_\_\_

After coupling cycle, before checking the BPB test, wash DMF (2x1') 

1:VAL    16:ILE    31:PRO    46:ILE  
 2:GLU    17:LYS    32:LEU    47:TYR  
 3:HIS    18:ARG    33:ASP    48:GLN  
 4:HIS    19:LEU    34:VAL    49:SER  
 5:GLU    20:LEU    35:VAL    50:LYS  
 6:THR    21:GLN    36:ALA    51:ASP  
 7:GLU    22:SER    37:LEU    52:SER  
 8:PHE    23:ILE    38:LYS  
 9:GLU    24:GLY    39:SER  
 10:LYS    25:PHE    40:SER  
 11:LYS    26:VAL    41:SER  
 12:TYR    27:THR    42:ARG  
 13:THR    28:LYS    43:ALA  
 14:ARG    29:LYS    44:SER  
 15:ARG    30:ARG    45:GLY

## COUPLING NUMBER 6

ALA: 3 16 49 =**3**  
 ASP: 2 26 =**2**  
 GLU: 12 34 37 =**3**  
 PHE: 39 =**1**  
 GLY: 17 40 =**2**  
 HIS: 19 32 =**2**  
 ILE: 35 38 45 50 =**4**  
 LYS: 5 6 14 24 =**4**  
 LEU: 4 7 13 15 20 21 22 23 25 27 36 42 48 =**13**  
 PRO: 9 44 46 =**3**  
 GLN: 1 8 18 28 29 =**5**  
 ARG: 11 33 51 =**3**  
 SER: 41 43 47 52 =**4**  
 THR: 31 =**1**  
 VAL: 30 =**1**  
 TYR: 10 =**1**

DEPROTECTION      DATE \_\_\_\_/\_\_\_\_/\_\_\_\_      CHECK      MADE BY      REVIEWED BY

4MP 20% TritonX100 1%/DMF (2x10')  | \_\_\_\_ | \_\_\_\_ | \_\_\_\_ | \_\_\_\_

Wash DMF (3x1')  | \_\_\_\_ | \_\_\_\_ | \_\_\_\_ | \_\_\_\_

Wash IPA (1x1') | \_\_\_\_ | \_\_\_\_ | \_\_\_\_ | \_\_\_\_

Wash BPB 1%/DMF (1x2') | \_\_\_\_ | \_\_\_\_ | \_\_\_\_ | \_\_\_\_

Wash DMF (2x1')  | \_\_\_\_ | \_\_\_\_ | \_\_\_\_ | \_\_\_\_

Wash DCM (1x1') | \_\_\_\_ | \_\_\_\_ | \_\_\_\_ | \_\_\_\_

Coupling Cycle      DATE      HOUR      MADE BY      REVIEWED BY

AA+HBTU+OXYMA+DIPEA

Single (5:5:5:7,5) | \_\_\_\_/\_\_\_\_/\_\_\_\_ | \_\_\_\_:\_\_\_\_ | \_\_\_\_:\_\_\_\_ | \_\_\_\_

AA+HCTU+OXYMA+DIPEA

Double (5:5:5:7,5)  | \_\_\_\_/\_\_\_\_/\_\_\_\_ | \_\_\_\_:\_\_\_\_ | \_\_\_\_:\_\_\_\_ | \_\_\_\_

AA+DIC+OXYMA

Triple (5:5:5)  | \_\_\_\_/\_\_\_\_/\_\_\_\_ | \_\_\_\_:\_\_\_\_ | \_\_\_\_:\_\_\_\_ | \_\_\_\_

After coupling cycle, before checking the BPB test, wash DMF (2x1') 

1:GLN    16:ALA    31:THR    46:PRO  
 2:ASP    17:GLY    32:HIS    47:SER  
 3:ALA    18:GLN    33:ARG    48:LEU  
 4:LEU    19:HIS    34:GLU    49:ALA  
 5:LYS    20:LEU    35:ILE    50:ILE  
 6:LYS    21:LEU    36:LEU    51:ARG  
 7:LEU    22:LEU    37:GLU    52:SER  
 8:GLN    23:LEU    38:ILE  
 9:PRO    24:LYS    39:PHE  
 10:TYR    25:LEU    40:GLY  
 11:ARG    26:ASP    41:SER  
 12:GLU    27:LEU    42:LEU  
 13:LEU    28:GLN    43:SER  
 14:LYS    29:GLN    44:PRO  
 15:LEU    30:VAL    45:ILE

## COUPLING NUMBER 7

ALA: 16 =1  
 ASP: 38 =1  
 GLU: 23 47 =2  
 PHE: 10 28 51 =3  
 GLY: 26 =1  
 HIS: 35 =1  
 ILE: 9 =1  
 LYS: 13 25 27 29 31 37 52 =7  
 LEU: 3 5 11 17 18 19 24 =7  
 ASN: 32 =1  
 PRO: 2 6 =2  
 GLN: 12 21 36 41 =4  
 ARG: 8 44 45 =3  
 SER: 14 20 30 40 46 48 =6  
 THR: 1 4 =2  
 VAL: 15 33 34 39 42 43 49 =7  
 TYR: 7 22 50 =3

DEPROTECTION      DATE \_\_\_\_/\_\_\_\_/\_\_\_\_      CHECK      MADE BY      REVIEWED BY

4MP 20% TritonX100 1%/DMF (2x1') (C)      | \_\_\_\_ | \_\_\_\_ | \_\_\_\_ | \_\_\_\_

Wash DMF (3x1') (C)      | \_\_\_\_ | \_\_\_\_ | \_\_\_\_ | \_\_\_\_

Wash IPA (1x1')      | \_\_\_\_ | \_\_\_\_ | \_\_\_\_ | \_\_\_\_

Wash BPB 1%/DMF (1x2')      | \_\_\_\_ | \_\_\_\_ | \_\_\_\_ | \_\_\_\_

Wash DMF (2x1') (C)      | \_\_\_\_ | \_\_\_\_ | \_\_\_\_ | \_\_\_\_

Wash DCM (1x1')      | \_\_\_\_ | \_\_\_\_ | \_\_\_\_ | \_\_\_\_

Coupling Cycle      DATE      HOUR      MADE BY      REVIEWED BY

AA+HBTU+OXYMA+DIPEA

Single (5:5:5:7,5)      | \_\_\_\_/\_\_\_\_/\_\_\_\_ | \_\_\_\_:\_\_\_\_ | \_\_\_\_:\_\_\_\_ | \_\_\_\_

AA+HCTU+OXYMA+DIPEA

Double (5:5:5:7,5) (C)      | \_\_\_\_/\_\_\_\_/\_\_\_\_ | \_\_\_\_:\_\_\_\_ | \_\_\_\_:\_\_\_\_ | \_\_\_\_

AA+DIC+OXYMA

Triple (5:5:5) (C)      | \_\_\_\_/\_\_\_\_/\_\_\_\_ | \_\_\_\_:\_\_\_\_ | \_\_\_\_:\_\_\_\_ | \_\_\_\_

After coupling cycle, before checking the BPB test, wash DMF (2x1') (C)

1:THR    16:ALA    31:LYS    46:SER  
 2:PRO    17:LEU    32:ASN    47:GLU  
 3:LEU    18:LEU    33:VAL    48:SER  
 4:THR    19:LEU    34:VAL    49:VAL  
 5:LEU    20:SER    35:HIS    50:TYR  
 6:PRO    21:GLN    36:GLN    51:PHE  
 7:TYR    22:TYR    37:LYS    52:LYS  
 8:ARG    23:GLU    38:ASP  
 9:ILE    24:LEU    39:VAL  
 10:PHE    25:LYS    40:SER  
 11:LEU    26:GLY    41:GLN  
 12:GLN    27:LYS    42:VAL  
 13:LYS    28:PHE    43:VAL  
 14:SER    29:LYS    44:ARG  
 15:VAL    30:SER    45:ARG

## COUPLING NUMBER 8

ALA: 14 49 51 =**3**  
 ASP: 13 36 38 39 =**4**  
 GLU: 21 23 =**2**  
 PHE: 10 31 34 41 =**4**  
 GLY: 7 30 =**2**  
 HIS: 28 =**1**  
 ILE: 12 =**1**  
 LYS: 1 33 42 45 =**4**  
 LEU: 6 15 17 27 32 35 46 48 =**8**  
 ASN: 18 =**1**  
 PRO: 5 25 50 =**3**  
 GLN: 11 16 20 52 =**4**  
 SER: 2 9 22 24 47 =**5**  
 THR: 3 4 43 =**3**  
 VAL: 26 29 37 40 =**4**  
 TYR: 8 19 =**2**  
 OUT: 44 =**1**

DEPROTECTION      DATE \_\_\_\_/\_\_\_\_/\_\_\_\_      CHECK      MADE BY      REVIEWED BY

4MP 20% TritonX100 1%/DMF (2x1')  | \_\_\_\_ | \_\_\_\_ | \_\_\_\_\_

Wash DMF (3x1')  | \_\_\_\_ | \_\_\_\_ | \_\_\_\_\_

Wash IPA (1x1') | \_\_\_\_\_

Wash BPB 1%/DMF (1x2') | \_\_\_\_\_

Wash DMF (2x1')  | \_\_\_\_ | \_\_\_\_ | \_\_\_\_\_

Wash DCM (1x1') | \_\_\_\_\_

Coupling Cycle      DATE      HOUR      MADE BY      REVIEWED BY

AA+HBTU+OXYMA+DIPEA

Single (5:5:5:7,5) | \_\_\_\_/\_\_\_\_/\_\_\_\_ | \_\_\_\_:\_\_\_\_ | \_\_\_\_:\_\_\_\_ | \_\_\_\_\_

AA+HCTU+OXYMA+DIPEA

Double (5:5:5:7,5)  | \_\_\_\_/\_\_\_\_/\_\_\_\_ | \_\_\_\_:\_\_\_\_ | \_\_\_\_:\_\_\_\_ | \_\_\_\_\_

AA+DIC+OXYMA

Triple (5:5:5)  | \_\_\_\_/\_\_\_\_/\_\_\_\_ | \_\_\_\_:\_\_\_\_ | \_\_\_\_:\_\_\_\_ | \_\_\_\_\_

After coupling cycle, before checking the BPB test, wash DMF (2x1') 

1:LYS    16:GLN    31:PHE    46:LEU  
 2:SER    17:LEU    32:LEU    47:SER  
 3:THR    18:ASN    33:LYS    48:LEU  
 4:THR    19:TYR    34:PHE    49:ALA  
 5:PRO    20:GLN    35:LEU    50:PRO  
 6:LEU    21:GLU    36:ASP    51:ALA  
 7:GLY    22:SER    37:VAL    52:GLN  
 8:TYR    23:GLU    38:ASP  
 9:SER    24:SER    39:ASP  
 10:PHE    25:PRO    40:VAL  
 11:GLN    26:VAL    41:PHE  
 12:ILE    27:LEU    42:LYS  
 13:ASP    28:HIS    43:THR  
 14:ALA    29:VAL    44:OUT  
 15:LEU    30:GLY    45:LYS



## COUPLING NUMBER 9

ALA: 10 16 23 49 =**4**  
 ASP: 9 36 43 =**3**  
 GLU: 2 20 28 =**3**  
 HIS: 5 12 27 =**3**  
 ILE: 7 24 25 =**3**  
 LYS: 3 19 22 29 32 50 51 =**7**  
 LEU: 1 14 39 46 =**4**  
 PRO: 6 17 40 47 =**4**  
 GLN: 33 42 =**2**  
 ARG: 21 35 =**2**  
 SER: 13 15 18 38 45 48 52 =**7**  
 THR: 30 =**1**  
 VAL: 4 31 34 =**3**  
 TYR: 8 26 37 41 =**4**  
 OUT: 11 =**1**

DEPROTECTION      DATE \_\_\_\_/\_\_\_\_/\_\_\_\_      CHECK      MADE BY      REVIEWED BY

4MP 20% TritonX100 1%/DMF(2x1') (C) |\_\_\_\_|\_\_\_\_|\_\_\_\_|\_\_\_\_|

Wash DMF(3x1') (C) |\_\_\_\_|\_\_\_\_|\_\_\_\_|\_\_\_\_|

Wash IPA(1x1') |\_\_\_\_|\_\_\_\_|\_\_\_\_|\_\_\_\_|

Wash BPB 1%/DMF(1x2') |\_\_\_\_|\_\_\_\_|\_\_\_\_|\_\_\_\_|

Wash DMF(2x1') (C) |\_\_\_\_|\_\_\_\_|\_\_\_\_|\_\_\_\_|

Wash DCM(1x1') |\_\_\_\_|\_\_\_\_|\_\_\_\_|\_\_\_\_|

Coupling Cycle      DATE      HOUR      MADE BY      REVIEWED BY

AA+HBTU+OXYMA+DIPEA

Single (5:5:5:7,5) |\_\_\_\_/\_\_\_\_/\_\_\_\_|\_\_\_\_:\_\_\_\_|\_\_\_\_:\_\_\_\_|\_\_\_\_|

AA+HCTU+OXYMA+DIPEA

Double (5:5:5:7,5) (C) |\_\_\_\_/\_\_\_\_/\_\_\_\_|\_\_\_\_:\_\_\_\_|\_\_\_\_:\_\_\_\_|\_\_\_\_|

AA+DIC+OXYMA

Triple (5:5:5) (C) |\_\_\_\_/\_\_\_\_/\_\_\_\_|\_\_\_\_:\_\_\_\_|\_\_\_\_:\_\_\_\_|\_\_\_\_|

After coupling cycle, before checking the BPB test, wash DMF(2x1') (C)

1:LEU    16:ALA    31:VAL    47:PRO  
 2:GLU    17:PRO    32:LYS    48:SER  
 3:LYS    18:SER    33:GLN    49:ALA  
 4:VAL    19:LYS    34:VAL    50:LYS  
 5:HIS    20:GLU    35:ARG    51:LYS  
 6:PRO    21:ARG    36:ASP    52:SER  
 7:ILE    22:LYS    37:TYR  
 8:TYR    23:ALA    38:SER  
 9:ASP    24:ILE    39:LEU  
 10:ALA    25:ILE    40:PRO  
 11:OUT    26:TYR    41:TYR  
 12:HIS    27:HIS    42:GLN  
 13:SER    28:GLU    43:ASP  
 14:LEU    29:LYS    45:SER  
 15:SER    30:THR    46:LEU

## COUPLING NUMBER 10

ALA: 12 36 41 49 =**4**  
 ASP: 1 14 32 =**3**  
 GLU: 24 27 51 52 =**4**  
 PHE: 40 =**1**  
 GLY: 10 16 =**2**  
 HIS: 3 30 =**2**  
 ILE: 31 37 =**2**  
 LYS: 2 6 38 39 45 =**5**  
 LEU: 8 9 17 22 23 =**5**  
 ASN: 26 34 42 43 =**4**  
 PRO: 5 29 35 =**3**  
 ARG: 19 48 =**2**  
 SER: 13 15 28 33 46 47 =**6**  
 THR: 25 =**1**  
 VAL: 4 7 18 20 21 50 =**6**

DEPROTECTION      DATE \_\_\_\_/\_\_\_\_/\_\_\_\_      CHECK      MADE BY      REVIEWED BY

4MP 20% TritonX100 1%/DMF(2x10') (C) |\_\_\_\_|\_\_\_\_|\_\_\_\_|\_\_\_\_|

Wash DMF(3x1') (C) |\_\_\_\_|\_\_\_\_|\_\_\_\_|\_\_\_\_|

Wash IPA(1x1') |\_\_\_\_|\_\_\_\_|\_\_\_\_|\_\_\_\_|

Wash BPB 1%/DMF(1x2') |\_\_\_\_|\_\_\_\_|\_\_\_\_|\_\_\_\_|

Wash DMF(2x1') (C) |\_\_\_\_|\_\_\_\_|\_\_\_\_|\_\_\_\_|

Wash DCM(1x1') |\_\_\_\_|\_\_\_\_|\_\_\_\_|\_\_\_\_|

Coupling Cycle      DATE      HOUR      MADE BY      REVIEWED BY

AA+HBTU+OXYMA+DIPEA

Single (5:5:5:7,5) |\_\_\_\_/\_\_\_\_/\_\_\_\_|\_\_\_\_:\_\_\_\_|\_\_\_\_:\_\_\_\_|\_\_\_\_|\_\_\_\_|

AA+HCTU+OXYMA+DIPEA

Double (5:5:5:7,5) (C) |\_\_\_\_/\_\_\_\_/\_\_\_\_|\_\_\_\_:\_\_\_\_|\_\_\_\_:\_\_\_\_|\_\_\_\_|\_\_\_\_|

AA+DIC+OXYMA

Triple (5:5:5) (C) |\_\_\_\_/\_\_\_\_/\_\_\_\_|\_\_\_\_:\_\_\_\_|\_\_\_\_:\_\_\_\_|\_\_\_\_|\_\_\_\_|

After coupling cycle, before checking the BPB test, wash DMF(2x1') (C)

|               |               |               |        |
|---------------|---------------|---------------|--------|
| 1:ASP         | 17:LEU        | 32:ASP        | 48:ARG |
| 2:LYS         | 18:VAL        | 33:SER        | 49:ALA |
| 3:HIS         | 19:ARG        | 34:ASN        | 50:VAL |
| 4:VAL         | 20:VAL        | 35:PRO        | 51:GLU |
| 5:PRO         | <u>21:VAL</u> | 36:ALA        | 52:GLU |
| 6:LYS         | 22:LEU        | 37:ILE        |        |
| 7:VAL         | 23:LEU        | 38:LYS        |        |
| 8:LEU         | 24:GLU        | 39:LYS        |        |
| 9:LEU         | <u>25:THR</u> | 40:PHE        |        |
| 10:GLY        | 26:ASN        | 41:ALA        |        |
| 12:ALA        | 27:GLU        | 42:ASN        |        |
| 13:SER        | 28:SER        | <u>43:ASN</u> |        |
| <u>14:ASP</u> | 29:PRO        | 45:LYS        |        |
| 15:SER        | <u>30:HIS</u> | 46:SER        |        |
| 16:GLY        | 31:ILE        | <u>47:SER</u> |        |

## COUPLING NUMBER 11

ALA: 2 31 =**2**  
 GLU: 9 =**1**  
 PHE: 36 =**1**  
 HIS: 6 =**1**  
 ILE: 45 48 =**2**  
 LYS: 15 18 24 29 33 =**5**  
 LEU: 3 4 5 10 13 32 38 =**7**  
 ASN: 37 40 =**2**  
 PRO: 12 =**1**  
 GLN: 8 20 28 35 =**4**  
 ARG: 16 17 =**2**  
 SER: 19 39 42 46 52 =**5**  
 THR: 7 41 50 =**3**  
 VAL: 22 23 27 49 51 =**5**  
 TYR: 26 34 =**2**  
 OUT: 1 14 21 25 30 43 47 =**7**

DEPROTECTION      DATE \_\_\_\_/\_\_\_\_/\_\_\_\_      CHECK      MADE BY      REVIEWED BY

4MP 20% TritonX100 1%/DMF (2x10') (C) | \_\_\_\_ | \_\_\_\_ | \_\_\_\_ | \_\_\_\_

Wash DMF (3x1') (C) | \_\_\_\_ | \_\_\_\_ | \_\_\_\_ | \_\_\_\_

Wash IPA (1x1') | \_\_\_\_ | \_\_\_\_ | \_\_\_\_ | \_\_\_\_

Wash BPB 1%/DMF (1x2') | \_\_\_\_ | \_\_\_\_ | \_\_\_\_ | \_\_\_\_

Wash DMF (2x1') (C) | \_\_\_\_ | \_\_\_\_ | \_\_\_\_ | \_\_\_\_

Wash DCM (1x1') | \_\_\_\_ | \_\_\_\_ | \_\_\_\_ | \_\_\_\_

Coupling Cycle      DATE      HOUR      MADE BY      REVIEWED BY

AA+HBTU+OXYMA+DIPEA

Single (5:5:5:7,5) | \_\_\_\_/\_\_\_\_/\_\_\_\_ | \_\_\_\_:\_\_\_\_ | \_\_\_\_:\_\_\_\_ | \_\_\_\_

AA+HCTU+OXYMA+DIPEA

Double (5:5:5:7,5) (C) | \_\_\_\_/\_\_\_\_/\_\_\_\_ | \_\_\_\_:\_\_\_\_ | \_\_\_\_:\_\_\_\_ | \_\_\_\_

AA+DIC+OXYMA

Triple (5:5:5) (C) | \_\_\_\_/\_\_\_\_/\_\_\_\_ | \_\_\_\_:\_\_\_\_ | \_\_\_\_:\_\_\_\_ | \_\_\_\_

After coupling cycle, before checking the BPB test, wash DMF (2x1') (C)

1:OUT    17:ARG    32:LEU    48:ILE  
 2:ALA    18:LYS    33:LYS    49:VAL  
 3:LEU    19:SER    34:TYR    50:THR  
 4:LEU    20:GLN    35:GLN    51:VAL  
 5:LEU    21:OUT    36:PHE    52:SER  
 6:HIS    22:VAL    37:ASN  
 7:THR    23:VAL    38:LEU  
 8:GLN    24:LYS    39:SER  
 9:GLU    25:OUT    40:ASN  
 10:LEU    26:TYR    41:THR  
 12:PRO    27:VAL    42:SER  
 13:LEU    28:GLN    43:OUT  
 14:OUT    29:LYS    45:ILE  
 15:LYS    30:OUT    46:SER  
 16:ARG    31:ALA    47:OUT

## COUPLING NUMBER 12

ALA: 22 36 40 48 49 =5  
 ASP: 20 26 =2  
 GLU: 13 18 23 27 37 =5  
 PHE: 50 51 =2  
 GLY: 15 52 =2  
 HIS: 34 =1  
 ILE: 28 =1  
 LYS: 7 =1  
 LEU: 12 24 29 38 45 =5  
 MET: 6 =1  
 ASN: 17 =1  
 PRO: 2 46 =2  
 GLN: 4 5 =2  
 ARG: 10 =1  
 SER: 39 =1  
 THR: 8 33 41 =3  
 VAL: 19 32 =2  
 TYR: 3 31 35 =3  
 OUT: 9 16 42 =3

| DEPROTECTION                     | DATE ____/____/____ | CHECK | MADE BY | REVIEWED BY |
|----------------------------------|---------------------|-------|---------|-------------|
| 4MP 20% TritonX100 1%/DMF (2x1') |                     |       |         |             |
| Wash DMF (3x1')                  |                     |       |         |             |
| Wash IPA (1x1')                  |                     |       |         |             |
| Wash BPB 1%/DMF (1x2')           |                     |       |         |             |
| Wash DMF (2x1')                  |                     |       |         |             |
| Wash DCM (1x1')                  |                     |       |         |             |

| Coupling Cycle      | DATE           | HOUR     | MADE BY | REVIEWED BY |
|---------------------|----------------|----------|---------|-------------|
| AA+HBTU+OXYMA+DIPEA |                |          |         |             |
| Single (5:5:5:7,5)  | ____/____/____ | __:__:__ |         |             |
| AA+HCTU+OXYMA+DIPEA |                |          |         |             |
| Double (5:5:5:7,5)  | ____/____/____ | __:__:__ |         |             |
| AA+DIC+OXYMA        |                |          |         |             |
| Triple (5:5:5)      | ____/____/____ | __:__:__ |         |             |

After coupling cycle, before checking the BPB test, wash DMF (2x1')

2:PRO 19:VAL 37:GLU  
 3:TYR 20:ASP 38:LEU  
 4:GLN 22:ALA 39:SER  
 5:GLN 23:GLU 40:ALA  
 6:MET 24:LEU 41:THR  
 7:LYS 26:ASP 42:OUT  
 8:THR 27:GLU 45:LEU  
 9:OUT 28:ILE 46:PRO  
 10:ARG 29:LEU 48:ALA  
 12:LEU 31:TYR 49:ALA  
 13:GLU 32:VAL 50:PHE  
 15:GLY 33:THR 51:PHE  
 16:OUT 34:HIS 52:GLY  
 17:ASN 35:TYR  
 18:GLU 36:ALA

## COUPLING NUMBER 13

ALA: 13 34 =**2**  
 ASP: 5 51 =**2**  
 GLU: 7 =**1**  
 GLY: 28 =**1**  
 ILE: 10 =**1**  
 LYS: 29 32 35 39 52 =**5**  
 LEU: 19 20 26 27 33 37 =**6**  
 ASN: 3 17 18 45 =**4**  
 PRO: 8 36 38 =**3**  
 GLN: 12 31 49 =**3**  
 ARG: 22 50 =**2**  
 SER: 2 6 40 =**3**  
 THR: 46 =**1**  
 VAL: 15 23 =**2**  
 TYR: 4 =**1**  
 OUT: 24 41 48 =**3**

DEPROTECTION      DATE \_\_\_\_/\_\_\_\_/\_\_\_\_      CHECK      MADE BY      REVIEWED BY

4MP 20% TritonX100 1%/DMF (2x10')  | \_\_\_\_ | \_\_\_\_ | \_\_\_\_ | \_\_\_\_

Wash DMF (3x1')  | \_\_\_\_ | \_\_\_\_ | \_\_\_\_ | \_\_\_\_

Wash IPA (1x1') | \_\_\_\_ | \_\_\_\_ | \_\_\_\_ | \_\_\_\_

Wash BPB 1%/DMF (1x2') | \_\_\_\_ | \_\_\_\_ | \_\_\_\_ | \_\_\_\_

Wash DMF (2x1')  | \_\_\_\_ | \_\_\_\_ | \_\_\_\_ | \_\_\_\_

Wash DCM (1x1') | \_\_\_\_ | \_\_\_\_ | \_\_\_\_ | \_\_\_\_

Coupling Cycle      DATE      HOUR      MADE BY      REVIEWED BY

AA+HBTU+OXYMA+DIPEA

Single (5:5:5:7,5) | \_\_\_\_/\_\_\_\_/\_\_\_\_ | \_\_\_\_:\_\_\_\_ | \_\_\_\_:\_\_\_\_ | \_\_\_\_

AA+HCTU+OXYMA+DIPEA

Double (5:5:5:7,5)  | \_\_\_\_/\_\_\_\_/\_\_\_\_ | \_\_\_\_:\_\_\_\_ | \_\_\_\_:\_\_\_\_ | \_\_\_\_

AA+DIC+OXYMA

Triple (5:5:5)  | \_\_\_\_/\_\_\_\_/\_\_\_\_ | \_\_\_\_:\_\_\_\_ | \_\_\_\_:\_\_\_\_ | \_\_\_\_

After coupling cycle, before checking the BPB test, wash DMF (2x1') 

2:SER    22:ARG    39:LYS  
 3:ASN    23:VAL    40:SER  
 4:TYR    24:OUT    41:OUT  
 5:ASP    26:LEU    45:ASN  
6:SER    27:LEU    46:THR  
7:GLU    28:GLY    48:OUT  
 8:PRO    29:LYS    49:GLN  
 10:ILE    31:GLN    50:ARG  
 12:GLN    32:LYS    51:ASP  
 13:ALA    33:LEU    52:LYS  
 15:VAL    34:ALA  
17:ASN    35:LYS  
 18:ASN    36:PRO  
 19:LEU    37:LEU  
 20:LEU    38:PRO

## COUPLING NUMBER 14

ALA: 15 34 =**2**  
 ASP: 19 33 =**2**  
 GLU: 13 =**1**  
 HIS: 32 =**1**  
 ILE: 12 =**1**  
 LYS: 22 27 28 31 37 =**5**  
 LEU: 10 18 38 =**3**  
 PRO: 36 =**1**  
 GLN: 4 26 =**2**  
 ARG: 5 51 =**2**  
 SER: 8 23 50 =**3**  
 THR: 2 3 =**2**  
 VAL: 20 39 40 =**3**  
 OUT: 6 7 17 29 35 45 46 49 52 =**9**

| DEPROTECTION                      | DATE ____/____/____ | CHECK | MADE BY | REVIEWED BY |
|-----------------------------------|---------------------|-------|---------|-------------|
| 4MP 20% TritonX100 1%/DMF (2x10') |                     |       |         |             |
| Wash DMF (3x1')                   |                     |       |         |             |
| Wash IPA (1x1')                   |                     |       |         |             |
| Wash BPB 1%/DMF (1x2')            |                     |       |         |             |
| Wash DMF (2x1')                   |                     |       |         |             |
| Wash DCM (1x1')                   |                     |       |         |             |

| Coupling Cycle      | DATE | HOUR | MADE BY | REVIEWED BY |
|---------------------|------|------|---------|-------------|
| AA+HBTU+OXYMA+DIPEA |      |      |         |             |
| Single (5:5:5:7,5)  |      |      |         |             |
| AA+HCTU+OXYMA+DIPEA |      |      |         |             |
| Double (5:5:5:7,5)  |      |      |         |             |
| AA+DIC+OXYMA        |      |      |         |             |
| Triple (5:5:5)      |      |      |         |             |

After coupling cycle, before checking the BPB test, wash DMF (2x1')

|        |        |        |
|--------|--------|--------|
| 2:THR  | 22:LYS | 40:VAL |
| 3:THR  | 23:SER | 45:OUT |
| 4:GLN  | 26:GLN | 46:OUT |
| 5:ARG  | 27:LYS | 49:OUT |
| 6:OUT  | 28:LYS | 50:SER |
| 7:OUT  | 29:OUT | 51:ARG |
| 8:SER  | 31:LYS | 52:OUT |
| 10:LEU | 32:HIS |        |
| 12:ILE | 33:ASP |        |
| 13:GLU | 34:ALA |        |
| 15:ALA | 35:OUT |        |
| 17:OUT | 36:PRO |        |
| 18:LEU | 37:LYS |        |
| 19:ASP | 38:LEU |        |
| 20:VAL | 39:VAL |        |

## COUPLING NUMBER 15

ALA: 27 51 =2  
 ASP: 20 =1  
 GLU: 28 =1  
 PHE: 33 37 =2  
 GLY: 38 =1  
 HIS: 31 =1  
 ILE: 3 =1  
 LYS: 50 =1  
 LEU: 8 34 40 =3  
 PRO: 39 =1  
 GLN: 32 =1  
 ARG: 19 22 =2  
 SER: 2 10 12 23 36 =5  
 VAL: 4 =1  
 OUT: 5 13 15 18 26 =5

DEPROTECTION      DATE \_\_\_\_/\_\_\_\_/\_\_\_\_      CHECK      MADE BY      REVIEWED BY

4MP 20% TritonX100 1%/DMF(2x10') (C)      | \_\_\_\_ | \_\_\_\_ | \_\_\_\_ | \_\_\_\_

Wash DMF(3x1') (C)      | \_\_\_\_ | \_\_\_\_ | \_\_\_\_ | \_\_\_\_

Wash IPA(1x1')      | \_\_\_\_ | \_\_\_\_ | \_\_\_\_ | \_\_\_\_

Wash BPB 1%/DMF(1x2')      | \_\_\_\_ | \_\_\_\_ | \_\_\_\_ | \_\_\_\_

Wash DMF(2x1') (C)      | \_\_\_\_ | \_\_\_\_ | \_\_\_\_ | \_\_\_\_

Wash DCM(1x1')      | \_\_\_\_ | \_\_\_\_ | \_\_\_\_ | \_\_\_\_

Coupling Cycle      DATE      HOUR      MADE BY      REVIEWED BY

AA+HBTU+OXYMA+DIPEA

Single (5:5:5:7,5)      | \_\_\_\_/\_\_\_\_/\_\_\_\_ | \_\_\_\_:\_\_\_\_ | \_\_\_\_:\_\_\_\_ | \_\_\_\_

AA+HCTU+OXYMA+DIPEA

Double (5:5:5:7,5) (C)      | \_\_\_\_/\_\_\_\_/\_\_\_\_ | \_\_\_\_:\_\_\_\_ | \_\_\_\_:\_\_\_\_ | \_\_\_\_

AA+DIC+OXYMA

Triple (5:5:5) (C)      | \_\_\_\_/\_\_\_\_/\_\_\_\_ | \_\_\_\_:\_\_\_\_ | \_\_\_\_:\_\_\_\_ | \_\_\_\_

After coupling cycle, before checking the BPB test, wash DMF(2x1') (C)

2:SER      27:ALA

3:ILE      28:GLU

4:VAL      31:HIS

5:OUT      32:GLN

8:LEU      33:PHE

10:SER      34:LEU

12:SER      36:SER

13:OUT      37:PHE

15:OUT      38:GLY

18:OUT      39:PRO

19:ARG      40:LEU

20:ASP      50:LYS

22:ARG      51:ALA

23:SER

26:OUT

## COUPLING NUMBER 16

ASP: 23 =1  
 GLU: 20 =1  
 GLY: 40 =1  
 ILE: 28 =1  
 LYS: 4 22 =2  
 LEU: 19 =1  
 ASN: 34 =1  
 PRO: 12 33 36 =3  
 GLN: 32 =1  
 ARG: 2 =1  
 SER: 8 =1  
 THR: 39 =1  
 VAL: 31 38 =2  
 TYR: 37 =1  
 OUT: 3 10 27 50 51 =5

DEPROTECTION      DATE \_\_\_\_/\_\_\_\_/\_\_\_\_      CHECK      MADE BY      REVIEWED BY

4MP 20% TritonX100 1%/DMF (2x1') (C)      | \_\_\_\_ | \_\_\_\_ | \_\_\_\_ | \_\_\_\_

Wash DMF (3x1') (C)      | \_\_\_\_ | \_\_\_\_ | \_\_\_\_ | \_\_\_\_

Wash IPA (1x1')      | \_\_\_\_ | \_\_\_\_ | \_\_\_\_ | \_\_\_\_

Wash BPB 1%/DMF (1x2')      | \_\_\_\_ | \_\_\_\_ | \_\_\_\_ | \_\_\_\_

Wash DMF (2x1') (C)      | \_\_\_\_ | \_\_\_\_ | \_\_\_\_ | \_\_\_\_

Wash DCM (1x1')      | \_\_\_\_ | \_\_\_\_ | \_\_\_\_ | \_\_\_\_

Coupling Cycle      DATE      HOUR      MADE BY      REVIEWED BY

AA+HBTU+OXYMA+DIPEA

Single (5:5:5:7,5)      | \_\_\_\_/\_\_\_\_/\_\_\_\_ | \_\_\_\_:\_\_\_\_ | \_\_\_\_:\_\_\_\_ | \_\_\_\_

AA+HCTU+OXYMA+DIPEA

Double (5:5:5:7,5) (C)      | \_\_\_\_/\_\_\_\_/\_\_\_\_ | \_\_\_\_:\_\_\_\_ | \_\_\_\_:\_\_\_\_ | \_\_\_\_

AA+DIC+OXYMA

Triple (5:5:5) (C)      | \_\_\_\_/\_\_\_\_/\_\_\_\_ | \_\_\_\_:\_\_\_\_ | \_\_\_\_:\_\_\_\_ | \_\_\_\_

After coupling cycle, before checking the BPB test, wash DMF (2x1') (C)

2:ARG      34:ASN

3:OUT      36:PRO

4:LYS      37:TYR

8:SER      38:VAL

10:OUT      39:THR

12:PRO      40:GLY

19:LEU      50:OUT

20:GLU      51:OUT

22:LYS

23:ASP

27:OUT

28:ILE

31:VAL

32:GLN

33:PRO



## COUPLING NUMBER 17

ASP: 31 =1  
 LEU: 22 34 =2  
 ASN: 20 =1  
 PRO: 40 =1  
 ARG: 8 36 =2  
 SER: 4 19 23 38 =4  
 THR: 33 =1  
 TRP: 2 =1  
 TYR: 12 =1  
 OUT: 28 32 37 39 =4

DEPROTECTION      DATE \_\_\_\_/\_\_\_\_/\_\_\_\_      CHECK      MADE BY      REVIEWED BY

4MP 20% TritonX100 1%/DMF (2x10') (C) | \_\_\_\_ | \_\_\_\_ | \_\_\_\_ | \_\_\_\_

Wash DMF (3x1') (C) | \_\_\_\_ | \_\_\_\_ | \_\_\_\_ | \_\_\_\_

Wash IPA (1x1') | \_\_\_\_ | \_\_\_\_ | \_\_\_\_ | \_\_\_\_

Wash BPB 1%/DMF (1x2') | \_\_\_\_ | \_\_\_\_ | \_\_\_\_ | \_\_\_\_

Wash DMF (2x1') (C) | \_\_\_\_ | \_\_\_\_ | \_\_\_\_ | \_\_\_\_

Wash DCM (1x1') | \_\_\_\_ | \_\_\_\_ | \_\_\_\_ | \_\_\_\_

Coupling Cycle      DATE      HOUR      MADE BY      REVIEWED BY

AA+HBTU+OXYMA+DIPEA

Single (5:5:5:7,5) | \_\_\_\_/\_\_\_\_/\_\_\_\_ | \_\_\_\_:\_\_\_\_ | \_\_\_\_:\_\_\_\_ | \_\_\_\_ | \_\_\_\_

AA+HCTU+OXYMA+DIPEA

Double (5:5:5:7,5) (C) | \_\_\_\_/\_\_\_\_/\_\_\_\_ | \_\_\_\_:\_\_\_\_ | \_\_\_\_:\_\_\_\_ | \_\_\_\_ | \_\_\_\_

AA+DIC+OXYMA

Triple (5:5:5) (C) | \_\_\_\_/\_\_\_\_/\_\_\_\_ | \_\_\_\_:\_\_\_\_ | \_\_\_\_:\_\_\_\_ | \_\_\_\_ | \_\_\_\_

After coupling cycle, before checking the BPB test, wash DMF (2x1') (C)

2:TRP      38:SER

4:SER      39:OUT

8:ARG      40:PRO

12:TYR

19:SER

20:ASN

22:LEU

23:SER

28:OUT

31:ASP

32:OUT

33:THR

34:LEU

36:ARG

37:OUT

## COUPLING NUMBER 18

ASP: 40 =1  
 PHE: 12 =1  
 GLY: 34 38 =2  
 GLN: 8 =1  
 SER: 4 =1  
 THR: 31 =1  
 VAL: 2 =1  
 OUT: 19 20 22 23 33 36 =6

DEPROTECTION      DATE \_\_\_\_/\_\_\_\_/\_\_\_\_      CHECK      MADE BY      REVIEWED BY

4MP 20% TritonX100 1%/DMF (2x10') (C)      | \_\_\_\_ | \_\_\_\_ | \_\_\_\_ | \_\_\_\_

Wash DMF (3x1') (C)      | \_\_\_\_ | \_\_\_\_ | \_\_\_\_ | \_\_\_\_

Wash IPA (1x1')      | \_\_\_\_ | \_\_\_\_ | \_\_\_\_ | \_\_\_\_

Wash BPB 1%/DMF (1x2')      | \_\_\_\_ | \_\_\_\_ | \_\_\_\_ | \_\_\_\_

Wash DMF (2x1') (C)      | \_\_\_\_ | \_\_\_\_ | \_\_\_\_ | \_\_\_\_

Wash DCM (1x1')      | \_\_\_\_ | \_\_\_\_ | \_\_\_\_ | \_\_\_\_

Coupling Cycle      DATE      HOUR      MADE BY      REVIEWED BY

AA+HBTU+OXYMA+DIPEA

Single (5:5:5:7,5)      | \_\_\_\_/\_\_\_\_/\_\_\_\_ | \_\_\_\_:\_\_\_\_ | \_\_\_\_:\_\_\_\_ | \_\_\_\_

AA+HCTU+OXYMA+DIPEA

Double (5:5:5:7,5) (C)      | \_\_\_\_/\_\_\_\_/\_\_\_\_ | \_\_\_\_:\_\_\_\_ | \_\_\_\_:\_\_\_\_ | \_\_\_\_

AA+DIC+OXYMA

Triple (5:5:5) (C)      | \_\_\_\_/\_\_\_\_/\_\_\_\_ | \_\_\_\_:\_\_\_\_ | \_\_\_\_:\_\_\_\_ | \_\_\_\_

After coupling cycle, before checking the BPB test, wash DMF (2x1') (C)

2:VAL

4:SER

8:GLN

12:PHE

19:OUT

20:OUT

22:OUT

23:OUT

31:THR

33:OUT

34:GLY

36:OUT

38:GLY

40:ASP

## COUPLING NUMBER 19

PHE: 4 =1  
 LEU: 8 =1  
 PRO: 31 =1  
 OUT: 2 12 34 38 40 =5

| DEPROTECTION | DATE ____/____/____ | CHECK | MADE BY | REVIEWED BY |
|--------------|---------------------|-------|---------|-------------|
|--------------|---------------------|-------|---------|-------------|

|                                   |  |  |  |  |
|-----------------------------------|--|--|--|--|
| 4MP 20% TritonX100 1%/DMF (2x10') |  |  |  |  |
|-----------------------------------|--|--|--|--|

|                 |  |  |  |  |
|-----------------|--|--|--|--|
| Wash DMF (3x1') |  |  |  |  |
|-----------------|--|--|--|--|

|                 |  |  |  |  |
|-----------------|--|--|--|--|
| Wash IPA (1x1') |  |  |  |  |
|-----------------|--|--|--|--|

|                        |  |  |  |  |
|------------------------|--|--|--|--|
| Wash BPB 1%/DMF (1x2') |  |  |  |  |
|------------------------|--|--|--|--|

|                 |  |  |  |  |
|-----------------|--|--|--|--|
| Wash DMF (2x1') |  |  |  |  |
|-----------------|--|--|--|--|

|                 |  |  |  |  |
|-----------------|--|--|--|--|
| Wash DCM (1x1') |  |  |  |  |
|-----------------|--|--|--|--|

| Coupling Cycle | DATE | HOUR | MADE BY | REVIEWED BY |
|----------------|------|------|---------|-------------|
|----------------|------|------|---------|-------------|

AA+HBTU+OXYMA+DIPEA

|                    |                |          |  |  |
|--------------------|----------------|----------|--|--|
| Single (5:5:5:7,5) | ____/____/____ | __:__:__ |  |  |
|--------------------|----------------|----------|--|--|

AA+HCTU+OXYMA+DIPEA

|                    |                |          |  |  |
|--------------------|----------------|----------|--|--|
| Double (5:5:5:7,5) | ____/____/____ | __:__:__ |  |  |
|--------------------|----------------|----------|--|--|

AA+DIC+OXYMA

|                |                |          |  |  |
|----------------|----------------|----------|--|--|
| Triple (5:5:5) | ____/____/____ | __:__:__ |  |  |
|----------------|----------------|----------|--|--|

After coupling cycle, before checking the BPB test, wash DMF (2x1')

2:OUT

4:PHE

8:LEU

12:OUT

31:PRO

34:OUT

38:OUT

40:OUT

## COUPLING NUMBER 20

SER: 31 =1  
 THR: 4 =1  
 OUT: 8 =1

DEPROTECTION      DATE \_\_\_\_/\_\_\_\_/\_\_\_\_      CHECK      MADE BY      REVIEWED BY

4MP 20% TritonX100 1%/DMF (2x10')  | \_\_\_\_ | \_\_\_\_ | \_\_\_\_\_

Wash DMF (3x1')  | \_\_\_\_ | \_\_\_\_ | \_\_\_\_\_

Wash IPA (1x1') | \_\_\_\_\_ | \_\_\_\_\_

Wash BPB 1%/DMF (1x2') | \_\_\_\_\_ | \_\_\_\_\_

Wash DMF (2x1')  | \_\_\_\_ | \_\_\_\_ | \_\_\_\_\_

Wash DCM (1x1') | \_\_\_\_\_ | \_\_\_\_\_

Coupling Cycle      DATE      HOUR      MADE BY      REVIEWED BY

AA+HBTU+OXYMA+DIPEA

Single (5:5:5:7,5) | \_\_\_\_/\_\_\_\_/\_\_\_\_ | \_\_\_\_:\_\_\_\_ | \_\_\_\_:\_\_\_\_ | \_\_\_\_\_

AA+HCTU+OXYMA+DIPEA

Double (5:5:5:7,5)  | \_\_\_\_/\_\_\_\_/\_\_\_\_ | \_\_\_\_:\_\_\_\_ | \_\_\_\_:\_\_\_\_ | \_\_\_\_\_

AA+DIC+OXYMA

Triple (5:5:5)  | \_\_\_\_/\_\_\_\_/\_\_\_\_ | \_\_\_\_:\_\_\_\_ | \_\_\_\_:\_\_\_\_ | \_\_\_\_\_

After coupling cycle, before checking the BPB test, wash DMF (2x1') 

4:THR  
8:OUT  
31:SER

COUPLING NUMBER 21

OUT: 4 31 =2

| DEPROTECTION | DATE ____/____/____ | CHECK | MADE BY | REVIEWED BY |
|--------------|---------------------|-------|---------|-------------|
|--------------|---------------------|-------|---------|-------------|

|                                   |  |  |  |  |
|-----------------------------------|--|--|--|--|
| 4MP 20% TritonX100 1%/DMF (2x10') |  |  |  |  |
|-----------------------------------|--|--|--|--|

|                 |  |  |  |  |
|-----------------|--|--|--|--|
| Wash DMF (3x1') |  |  |  |  |
|-----------------|--|--|--|--|

|                 |  |  |  |  |
|-----------------|--|--|--|--|
| Wash IPA (1x1') |  |  |  |  |
|-----------------|--|--|--|--|

|                        |  |  |  |  |
|------------------------|--|--|--|--|
| Wash BPB 1%/DMF (1x2') |  |  |  |  |
|------------------------|--|--|--|--|

|                 |  |  |  |  |
|-----------------|--|--|--|--|
| Wash DMF (2x1') |  |  |  |  |
|-----------------|--|--|--|--|

|                 |  |  |  |  |
|-----------------|--|--|--|--|
| Wash DCM (1x1') |  |  |  |  |
|-----------------|--|--|--|--|

| Coupling Cycle | DATE | HOUR | MADE BY | REVIEWED BY |
|----------------|------|------|---------|-------------|
|----------------|------|------|---------|-------------|

AA+HBTU+OXYMA+DIPEA

|                    |                |          |  |  |
|--------------------|----------------|----------|--|--|
| Single (5:5:5:7,5) | ____/____/____ | __:__:__ |  |  |
|--------------------|----------------|----------|--|--|

AA+HCTU+OXYMA+DIPEA

|                    |                |          |  |  |
|--------------------|----------------|----------|--|--|
| Double (5:5:5:7,5) | ____/____/____ | __:__:__ |  |  |
|--------------------|----------------|----------|--|--|

AA+DIC+OXYMA

|                |                |          |  |  |
|----------------|----------------|----------|--|--|
| Triple (5:5:5) | ____/____/____ | __:__:__ |  |  |
|----------------|----------------|----------|--|--|

After coupling cycle, before checking the BPB test, wash DMF (2x1')

4:OUT

31:OUT
